1 **The thrombopoietin receptor agonist eltrombopag inhibits human**  
2 **cytomegalovirus replication via iron chelation**

3 Jens-Uwe Vogel<sup>1</sup>, Sophie Schmidt<sup>1</sup>, Daniel Schmidt<sup>1</sup>, Florian Rothweiler<sup>1</sup>, Benjamin  
4 Koch<sup>2</sup>, Patrick C. Baer<sup>2</sup>, Holger F. Rabenau<sup>1</sup>, Detlef Michel<sup>3</sup>, Thomas Stamminger<sup>3</sup>,  
5 Martin Michaelis<sup>4\*</sup>, Jindrich Cinatl Jr<sup>1\*</sup>

6 <sup>1</sup> Institut für Medizinische Virologie, Klinikum der Goethe-Universität, Frankfurt am  
7 Main, Germany

8 <sup>2</sup> Medizinische Klinik III, Nephrologie, Klinikum der Goethe-Universität, Frankfurt am  
9 Main, Germany

10 <sup>3</sup> Institut für Virologie, Universitätsklinikum Ulm, Germany

11 <sup>4</sup> School of Biosciences, University of Kent, Canterbury, UK

12

13 **\* correspondence:**

14 Jindrich Cinatl jr. Institut für Medizinische Virologie, Klinikum der Goethe-Universität,  
15 Paul Ehrlich-Straße 40, 60596 Frankfurt am Main, Germany

16 phone +49 69 67 86 65-72; fax +49 69 67 86-9172; e-mail: cinatl@em.uni-frankfurt.de

17 Martin Michaelis, School of Biosciences, University of Kent, Canterbury CT2 7NJ, UK

18 phone +44 1227 82-7804; fax +44 1227 82-4034; m.michaelis@kent.ac.uk (MM)

19

20 **Acknowledgements**

21 The work was supported by the Hilfe für krebskranke Kinder Frankfurt e.V. and the  
22 Frankfurter Stiftung für krebskranke Kinder.

23

24 **Abstract**

25       The thrombopoietin receptor agonist eltrombopag was successfully used  
26 against human cytomegalovirus (HCMV)-associated thrombocytopenia refractory to  
27 immunomodulatory and antiviral drugs. These effects were ascribed to effects of  
28 eltrombopag on megakaryocytes. Here, we tested whether eltrombopag may also  
29 exert direct antiviral effects. Therapeutic eltrombopag concentrations inhibited HCMV  
30 replication in human fibroblasts and adult mesenchymal stem cells infected with six  
31 different virus strains and drug-resistant clinical isolates. Eltrombopag also  
32 synergistically increased the anti-HCMV activity of the mainstay drug ganciclovir.  
33 Time-of-addition experiments suggested that eltrombopag interferes with HCMV  
34 replication after virus entry. Eltrombopag was effective in thrombopoietin receptor-  
35 negative cells, and addition of Fe<sup>3+</sup> prevented the anti-HCMV effects, indicating that it  
36 inhibits HCMV replication via iron chelation. This may be of particular interest for the  
37 treatment of cytopenias after haematopoietic stem cell transplantation, as HCMV  
38 reactivation is a major reason for transplantation failure. Since therapeutic  
39 eltrombopag concentrations are effective against drug-resistant viruses and  
40 synergistically increase the effects of ganciclovir, eltrombopag is also a drug  
41 repurposing candidate for the treatment of therapy-refractory HCMV disease.

42

43 **Key words:** human cytomegalovirus, antiviral therapy, eltrombopag, thrombopoietin  
44 receptor agonist, drug resistance, iron chelation

45

46

## 47 **Introduction**

48           Eltrombopag is a thrombopoietin receptor (also known as c-Mpl or MPL)  
49 agonist that is used for the treatment of thrombocytopenia [1-3]. Its use has also been  
50 suggested for the treatment of cytopenias after haematopoietic stem cell  
51 transplantations and case reports support its safety and efficacy [4-9].

52           Human cytomegalovirus (HCMV) reactivation and HCMV-associated disease  
53 are leading reasons for the failure of haematopoietic stem cell transplantations [10-  
54 12]. Anti-HCMV drugs including ganciclovir, cidofovir, and foscarnet are available, but  
55 their use is associated with severe side effects [13]. In particular, the use of ganciclovir  
56 (and its prodrug valganciclovir), the mainstay treatment for cytomegalovirus disease,  
57 is associated with severe haematological side effects including thrombocytopenia [14-  
58 16].

59           A case report described the use of eltrombopag in an immunocompetent patient  
60 who suffered from human cytomegalovirus (HCMV)-associated thrombocytopenia  
61 [17]. Immunosuppressive treatment for thrombocytopenia (prednisone, intravenous  
62 immunoglobulin, dapsone) in combination with antiviral therapy (ganciclovir/  
63 valganciclovir, HCMV hyperimmune globulin) only resulted in a temporary platelet  
64 response with subsequent relapse. A change to eltrombopag intended to increase  
65 platelet counts without immunosuppressive therapy resulted in a durable increase in  
66 platelet levels, no evidence of HCMV viraemia, and the resolution of symptoms [17].  
67 The observed effects were attributed to eltrombopag overcoming HCMV-induced  
68 suppression of platelet production [17]. However, we hypothesised that direct antiviral  
69 effects may also have contributed to the beneficial outcome in the case report of the  
70 patient with HCMV-associated thrombocytopenia [17]. Indeed, we found that  
71 eltrombopag exerts anti-HCMV effects via iron chelation.

## 72 **Materials and Methods**

### 73 **Drugs**

74 Eltrombopag (as its orally active ethanolamine salt eltrombopag olamine) was  
75 purchased from Selleck Chemicals (via Absource Diagnostics GmbH, Munich  
76 Germany), deferasirox and ganciclovir from MedChemExpress (via Hycultec,  
77 Beutelsbach, Germany), and cidofovir from Cayman Chemical (via Biomol GmbH,  
78 Hamburg, Germany).

79

### 80 **Cells and viruses**

81 Primary human foreskin fibroblasts (HFFs) and adipose-derived adult  
82 mesenchymal stem cells (ASCs) were cultivated as previously described [18,19].

83 The wild type HCMV strain Hi91 was isolated from the urine of an AIDS patient  
84 with HCMV retinitis as described previously [20]. HCMV strains Davis and Towne were  
85 received from ATCC (Manassas, VA, USA). Virus stocks were prepared in HFFs  
86 maintained in minimal essential medium (MEM) supplemented with 4% FCS. U1, U59,  
87 and U75 are patient isolates, which were isolated as previously described [20,21].  
88 Virus stocks were prepared in HFFs maintained in minimal essential medium (MEM)  
89 supplemented with 4% FCS.

90 Murine cytomegalovirus (Smith strain, catalogue number VR-1399) was  
91 obtained from ATCC and cultivated in NIH/3T3 mouse fibroblasts (ATCC).

92 DNA isolation, amplification, and sequencing were performed as previously  
93 described [21], using established primers [22].

94

## 95 **Virus infectivity assay**

96 In 96-well microtiter plates, confluent cultures of HFFs or ASCs cells were  
97 incubated with HCMV at the indicated multiplicities of infection (MOIs). After incubation  
98 for one hour, cells were washed with PBS and incubated in MEM containing 4% FCS  
99 and serial dilutions of the indicated substances.

100 As described previously [18,23], cells producing HCMV specific antigens were  
101 detected 24h post infection by immunoperoxidase staining using monoclonal  
102 antibodies directed against the UL123-coded 72 kDa immediate early antigen 1 (IEA1)  
103 (Mouse Anti CMV IEA, MAB8131, Millipore, Temecula, CA, USA) and 120h post-  
104 infection by immunoperoxidase staining using monoclonal antibodies directed against  
105 UL55-encoded late antigen gB (LA) (kindly provided by K. Radsak, Institut für  
106 Virologie, Marburg, Germany) as previously described. Drug concentrations that  
107 reduced HCMV antigen expression by 50% (IC<sub>50</sub>) were calculated using Calcsyn  
108 (Biosoft, Cambridge, United Kingdom).

109

## 110 **Drug combination studies**

111 Drugs were combined at equimolar concentrations and single agent as well as  
112 combined effects were determined by staining for HCMV LA. Combination indices  
113 (CIs) were calculated at different levels of inhibition (50% inhibition, CI<sub>50</sub>; 75%  
114 inhibition, CI<sub>75</sub>; 90% inhibition, CI<sub>90</sub>; 95% inhibition, CI<sub>95</sub>) by the method of Chou and  
115 Talalay [24] using CalcuSyn software version 1.0 (Biosoft, Cambridge, United  
116 Kingdom). Weighted average CI values (CI<sub>wt</sub>) were calculated as  $(CI_{50} + 2 \times CI_{75} + 3 \times$   
117  $CI_{90} + 4 \times CI_{95}) / 10$ . CI<sub>wt</sub> values  $\leq 0.7$  indicate synergistic effects, CI<sub>wt</sub> values  $> 0.7$  and  
118  $\leq 0.9$  moderately synergistic effects, CI<sub>wt</sub> values  $> 0.9$  and  $\leq 1.2$  additive effects, CI<sub>wt</sub>

119 values  $>1.2$  and  $\leq 1.45$  moderately antagonistic effects, and  $CI_{wt}$  values  $>1.45$   
120 antagonistic effects [24].

121

## 122 **Viability assay**

123 Cell viability was assessed using the 3-(4,5-dimethylthiazol-2-yl)-2,5-  
124 diphenyltetrazolium bromide (MTT) dye reduction assay as described previously [23].  
125 Confluent cell cultures in 96-well microtiter plates were incubated with culture medium  
126 containing serial dilutions of the indicated substances. After five days of incubation  
127 MTT (1 mg/ml) was added and after an additional four hours, cells were lysed in a  
128 buffer containing 20% (w/v) SDS and 50% N,N-dimethylformamide adjusted to pH 4.5.  
129 Absorbance was determined at 570 nm for each well using a 96-well multiscanner.  
130 After subtracting background absorbance, cell viability was expressed in per cent  
131 relative to untreated control cells. Drug concentrations that reduced cell viability by  
132 50% ( $CC_{50}$ ) were calculated using CalcuSyn (Biosoft, Cambridge, United Kingdom).

133

## 134 **Virus yield assay**

135 The amount of infectious virus was determined by virus yield assay in a single-  
136 cycle assay format as previously described [23]. Virus titres were expressed as 50%  
137 of tissue culture infectious dose ( $TCID_{50}$ / mL) 120 h post infection.

138

## 139 **Immunoblotting**

140 Immunoblotting was performed as described previously [23]. In brief, cells were  
141 lysed in Triton X-100 sample buffer and proteins separated by sodium dodecyl sulfated  
142 (SDS) SDS-PAGE. Proteins were detected using specific antibodies against  $\beta$ -actin  
143 (3598R-100-BV, BioVision via BioCat, Heidelberg, Germany) or HCMV 45 kDa late

144 antigen (MBS320051, MyBioSource via Biozol, Echingen, Germany) and were  
145 visualized by enhanced chemiluminescence using a commercially available kit  
146 (Thermo Scientific, Schwerte, Germany).

147

## 148 **Statistics**

149 Values presented are the mean  $\pm$  S.D. of three independent biological repeats.

150 Comparisons between two groups were performed using Student's t-test, three and

151 more groups were compared by ANOVA followed by the Student-Newman-Keuls test.

152 Data groups were considered significantly different at  $P < 0.05$ .

153

154

## 155 **Results**

156

### 157 **Eltrombopag inhibits HCMV replication in human foreskin fibroblasts by** 158 **interference with late processes of the replication cycle**

159       Eltrombopag did not affect HCMV Hi91-induced immediate early antigen (IEA)  
160 expression, but inhibited HCMV Hi91-induced late antigen (LA) expression with an  
161  $IC_{50}$  of 415 nM in HFFs (Figure 1A, 1B). Eltrombopag concentrations of up to 25 $\mu$ M  
162 did not reduce the viability of confluent or proliferating HFFs by 50%. Hence, the  
163 selectivity index  $CC_{50}/IC_{50}$  is higher than 60.2 (Figure 1A). Higher multiplicities of  
164 infection (MOIs) were associated with higher  $IC_{50}$  values (Figure 1C). At MOI 1, the  
165 highest MOI investigated in HFFs, the eltrombopag  $IC_{50}$  was 3844 nM. The observed  
166 eltrombopag concentrations are within the range of therapeutic plasma concentrations  
167 which have been described to exceed 45 $\mu$ M [25,26].

168       Eltrombopag-induced inhibition of HCMV LA translated into reduced virus  
169 replication as indicated by virus yield assay (Figure 2A). At a concentration of 10 $\mu$ M,  
170 eltrombopag reduced virus titres by  $1.8 \times 10^4$ -fold and at 500nM still by 15-fold.

171       The HCMV replication cycle is divided into three phases characterised by the  
172 expression of immediate early, delayed early, and late viral genes. Immediate early  
173 genes are transcribed immediately after infection and do not depend on synthesis of  
174 viral DNA or transcription of proteins. Delayed early proteins are represented by the  
175 viral DNA polymerase and other viral functions required for viral DNA synthesis and  
176 some viral structural proteins. Late genes encode mostly structural proteins used in  
177 viral assembly and packaging, and are generally expressed subsequent to delayed  
178 early genes [27].



179 To better define which phases of the viral replication cycle are affected by  
180 eltrombopag, the drug was added at different time points (Figure 2B, Suppl. Table 1).  
181 Pre-incubation and drug addition during the one-hour virus adsorption period did not  
182 or only modestly affect virus replication. This shows that eltrombopag does not  
183 primarily interfere with virus binding to host cells and virus internalisation but needs to  
184 be present during virus replication to exert its anti-HCMV effects. Drug addition one  
185 hour or 24h post infection was sufficient to achieve maximum inhibition of HCMV LA  
186 expression (Figure 2B, Suppl. Table 1). This, together with the observed lack of  
187 inhibition of HCMV IEA expression, indicates that eltrombopag inhibits the late stages  
188 of the HCMV replication cycle characterised by LA expression. Drug addition 48h post  
189 infection resulted in reduced effects compared to drug addition one hour or 24h post  
190 infection (Figure 2B, Suppl. Table 1).

191

### 192 **Eltrombopag inhibits HCMV expression via iron chelation**

193 Eltrombopag was developed as thrombopoietin receptor agonist [1-3].  
194 However, it is unlikely that eltrombopag inhibits HCMV replication via thrombopoietin  
195 receptor activation, because fibroblasts do not express the thrombopoietin receptor  
196 [28]. In agreement, eltrombopag also inhibited murine cytomegalovirus replication in  
197 murine NIH/3T3 fibroblasts (Figure 3A), although eltrombopag does not target the  
198 murine thrombopoietin receptor [29].

199 Eltrombopag is also an iron chelator [2,30,31], and iron chelators have been  
200 shown to inhibit HCMV replication [32-38]. The addition of equimolar  $Fe^{3+}$   
201 concentrations was shown to inhibit pharmacological action of eltrombopag that are  
202 caused via iron chelation [31]. Hence, we investigated eltrombopag in combination  
203 with equimolar  $Fe(III)Cl_3$  concentrations to investigate whether iron chelation is the

204 mechanism by which eltrombopag exerts its anti-HCMV effects (Figure 3B). Since  
205 equimolar Fe(III)Cl<sub>3</sub> concentrations prevented the anti-HCMV effects of eltrombopag  
206 (Figure 3B), we concluded that iron chelation is the main mechanism of eltrombopag's  
207 anti-HCMV activity.

208

### 209 **Eltrombopag exerts synergistic effects with ganciclovir**

210 Next, we tested eltrombopag in combination with ganciclovir, the mainstay of  
211 anti-HCMV therapies [13]. The combination of equimolar eltrombopag and ganciclovir  
212 concentrations resulted in synergistic anti-HCMV effects (Figure 4), which is illustrated  
213 by a weighted average combination index (CI<sub>WT</sub>) of 0.17 ± 0.03 as determined by the  
214 method of Chou and Talalay [24]. According to this method, combined effects are  
215 considered to be synergistic at a CI<sub>WT</sub> for <0.7 [24].

216

### 217 **Eltrombopag is effective in different cell types and against different virus strains** 218 **and isolates including drug-resistant ones**

219 Finally, we investigated the effects of eltrombopag against a broader range of  
220 laboratory virus strains and clinical isolates in HFFs and primary adipose-derived adult  
221 mesenchymal stem cells (ASCs), another cell type that supports HCMV replication  
222 [39]. The laboratory HCMV strains included Davis [40] and Towne [41] in addition to  
223 Hi91. The clinical isolates U1, U59, and U75 were isolated from the urine of patients  
224 as previously described [20,21]. U1 and U59 harbour a A987G mutation in the HCMV  
225 DNA polymerase UL54 (Table 1), which is known to confer combined ganciclovir and  
226 cidofovir resistance [42,43]. U1 also displays a C607Y mutation in the HCMV kinase  
227 UL97 (Table 1), which is associated with ganciclovir resistance [44,45]. In agreement,  
228 U1 and U59 were characterised by high ganciclovir and cidofovir IC<sub>50</sub>s (Table 1), which

229 are typically considered to indicate resistance [46-48]. U75 also displayed resistance  
230 to ganciclovir and cidofovir (Table 1), although it does not harbour known resistance  
231 mutations.

232 The eltrombopag IC<sub>50</sub>s ranged from 99nM (U1 in HFFs) to 4331nM (Hi91 in  
233 ASCs) (Figure 5A, Suppl. Table 2). When compared across the two cell types, the  
234 different HCMV strains and clinical isolates displayed similar eltrombopag sensitivity,  
235 apart from U1, which appeared to be particularly sensitive to eltrombopag in HFFs and  
236 ASCs (Figure 5B). The average HCMV sensitivity to eltrombopag was very similar in  
237 both cell types (Figure 5C).

238 To confirm the relevance of iron chelation as mechanism of the anti-HCMV  
239 action of eltrombopag using a clinical virus isolate, U1-infected HFFs were treated with  
240 equimolar concentrations of eltrombopag and Fe(III)Cl<sub>3</sub>. The presence of equimolar  
241 Fe<sup>3+</sup> concentrations prevented the eltrombopag-induced inhibition of HCMV LA  
242 expression in U1-infected cells in a comparable fashion (Figure 5D) as in Hi91-infected  
243 cells (Figure 3B).

244

## 245 Discussion

246 Here, we show that the approved thrombopoietin receptor agonist eltrombopag  
247 exerts anti-HCMV effects in various cell types infected with a range of different virus  
248 strains and clinical isolates including drug-resistant ones. The observed IC<sub>50</sub> values  
249 ranged from 99nM to 4331nM, which is in the range of therapeutic plasma  
250 concentrations that have been reported to exceed 45µM [25,26]. Eltrombopag also  
251 synergistically increased the activity of the approved anti-HCMV drug ganciclovir.

252 Our findings are in agreement with a case report on an immunocompetent  
253 patient, who suffered from HCMV-associated thrombocytopenia and recovered after  
254 eltrombopag therapy [17]. This response had originally been attributed to effects of  
255 eltrombopag on platelet production [17]. The possibility that eltrombopag may exert  
256 antiviral effects was not considered. Our current data show that therapeutic  
257 eltrombopag levels interfere with HCMV replication, which may have contributed to  
258 the beneficial clinical outcome. Notably, eltrombopag has also been shown to inhibit  
259 the replication of severe fever with thrombocytopenia syndrome virus, a member of  
260 the genus Banyangvirus (Phenuiviridae) [49].

261 The anti-HCMV effects of eltrombopag are unlikely to be caused by action on  
262 the thrombopoietin receptor, since eltrombopag was effective in cell types that do not  
263 express the thrombopoietin receptor, which is expressed in haematopoietic cells  
264 [28,29]. In agreement, eltrombopag also exerted antiviral effects in mouse fibroblasts  
265 infected with murine CMV, although the haematological effects of eltrombopag are  
266 known to be species-specific and to not affect mice [28,29].

267 Eltrombopag is also known to be an iron chelator [30,31]. Addition of Fe<sup>3+</sup>  
268 prevented the eltrombopag-mediated anti-HCMV effects in strain Hi91- and clinical

269 isolate U1-infected cells. Hence, our data suggest that eltrombopag inhibits HCMV  
270 replication via Fe<sup>3+</sup> chelation.

271 A number of different iron chelators including desferrioxamine,  
272 diethylenetriaminepentaacetic acid (DTPA), and ethylenediaminedisuccinic acid  
273 (EDDS) were shown to inhibit HCMV replication [32-38]. However, the iron chelators  
274 tiron and ciclopirox olamine were not found to inhibit HCMV strain AD169 replication  
275 in MRC5 cells [50]. The experimental set-up differed, as MRC5 cells were infected at  
276 a high MOI of 3 and no dose-response relationships were determined. Hence, a direct  
277 comparison is not possible. Notably, specific antiviral activity can easily be missed if  
278 the therapeutic window between antiviral and cytotoxic effects is relatively small. For  
279 example, desferrioxamine was found to inhibit HCMV replication at concentrations that  
280 did not decrease the viability of confluent fibroblasts but affected dividing cells [32]. In  
281 contrast, eltrombopag inhibits HCMV replication in concentrations that do not affect  
282 cell proliferation. Hence, the size of the therapeutic window that discriminates between  
283 anti-HCMV activity and antiproliferative and cytotoxic effects substantially differs  
284 among iron chelators, and eltrombopag seems to be an iron chelator that possesses  
285 a particularly preferential therapeutic window in terms of its anti-HCMV activity.

286 Eltrombopag has been suggested for the treatment of cytopenias after  
287 haematopoietic stem cell transplantations and case reports support its safety and  
288 efficacy [4-9]. Since HCMV reactivation and HCMV-associated disease are leading  
289 reasons for the failure of haematopoietic stem cell transplantations [10-12], antiviral  
290 effects exerted by eltrombopag may also contribute to improved therapy outcome.  
291 Notably, eltrombopag was effective against resistant clinical HCMV isolates, and  
292 resistance formation to the approved drugs is a major challenge after stem cell  
293 transplantation [11,12].

294            In conclusion, therapeutic eltrombopag concentrations inhibit HCMV replication  
295    via chelation of Fe<sup>3+</sup> ions. Eltrombopag is effective against drug-resistant viruses and  
296    synergistically increases the effects of the mainstay anti-HCMV drug ganciclovir. The  
297    anti-HCMV activity of eltrombopag may be of particular interest for its use for the  
298    treatment of cytopenias after haematopoietic stem cell transplantation, as HCMV  
299    reactivation and disease is a major reason for transplantation failure.  
300

301 **References**

- 302 1. Gill H, Wong RSM, Kwong YL (2017) From chronic immune thrombocytopenia to  
303 severe aplastic anemia: recent insights into the evolution of eltrombopag. *Ther Adv*  
304 *Hematol* 8:159-174
- 305 2. Scheinberg P (2018) Activity of eltrombopag in severe aplastic anemia. *Blood Adv*  
306 2:3054-3062
- 307 3. Ghanima W, Cooper N, Rodeghiero F, Godeau B, Bussel JB (2019) Thrombopoietin  
308 receptor agonists: ten years later. *Haematologica* 104:1112-1123
- 309 4. Master S, Dwary A, Mansour R, Mills GM, Koshy N (2018) Use of Eltrombopag in  
310 Improving Poor Graft Function after Allogeneic Hematopoietic Stem Cell  
311 Transplantation. *Case Rep Oncol* 11:191-195
- 312 5. Tang C, Chen F, Kong D, Ma Q, Dai H, Yin J, Li Z, Chen J, Zhu X, Mao X, Wu D,  
313 Tang X (2018) Successful treatment of secondary poor graft function post allogeneic  
314 hematopoietic stem cell transplantation with eltrombopag. *J Hematol Oncol* 11:103
- 315 6. Fu H, Zhang X, Han T, Mo X, Wang Y, Chen H, Han W, Wang J, Wang F, Yan C,  
316 Zhang Y, Sun Y, Liu K, Huang X, Xu L (2019) Eltrombopag is an effective and safe  
317 therapy for refractory thrombocytopenia after haploidentical hematopoietic stem cell  
318 transplantation. *Bone Marrow Transplant* 54:1310-1318
- 319 7. Guenther KL, Cheruku PS, Cash A, Smith RH, Alvarado LJ, Burkett S, Townsley  
320 DM, Winkler T, Larochele A (2019) Eltrombopag promotes DNA repair in human  
321 hematopoietic stem and progenitor cells. *Exp Hematol* 73:1-6.e6
- 322 8. Marotta S, Marano L, Ricci P, Cacace F, Frieri C, Simeone L, Trastulli F, Vitiello S,  
323 Cardano F, Pane F, Risitano AM (2019) Eltrombopag for post-transplant cytopenias  
324 due to poor graft function. *Bone Marrow Transplant* 54:1346-1353

- 325 9. Rivera D, Bastida JM, Lopez-Corral L, Sanchez-Guijo F, Cabrero M, Martin A, Perez  
326 E, Lopez-Parra M, Avendaño A, Veiga A, Baile M, Arratibel N, Carrillo J, Vazquez L,  
327 Caballero MD, Gonzalez-Porras JR (2019) Usefulness of eltrombopag for treating  
328 thrombocytopenia after allogeneic stem cell transplantation. *Bone Marrow Transplant*  
329 54:757-761.
- 330 10. Cho SY, Lee DG, Kim HJ (2019) Cytomegalovirus Infections after Hematopoietic  
331 Stem Cell Transplantation: Current Status and Future Immunotherapy. *Int J Mol Sci*  
332 20:pii: E2666
- 333 11. Ljungman P, de la Camara R, Robin C, Crocchiolo R, Einsele H, Hill JA, Hubacek  
334 P, Navarro D, Cordonnier C, Ward KN; 2017 European Conference on Infections in  
335 Leukaemia group (2019) Guidelines for the management of cytomegalovirus infection  
336 in patients with haematological malignancies and after stem cell transplantation from  
337 the 2017 European Conference on Infections in Leukaemia (ECIL 7). *Lancet Infect Dis*  
338 19:e260-e272
- 339 12. Pande A, Dubberke ER (2019) Cytomegalovirus Infections of the Stem Cell  
340 Transplant Recipient and Hematologic Malignancy Patient. *Infect Dis Clin North Am*  
341 33:485-500
- 342 13. Britt WJ, Prichard MN (2018) New therapies for human cytomegalovirus infections.  
343 *Antiviral Res* 159:153-174
- 344 14. McGavin JK, Goa KL (2001) Ganciclovir: an update of its use in the prevention of  
345 cytomegalovirus infection and disease in transplant recipients. *Drugs* 61:1153-1183
- 346 15. Busca A, de Fabritiis P, Ghisetti V, Alice T, Mirabile M, Gentile G, Locatelli F,  
347 Falda M (2007) Oral valganciclovir as preemptive therapy for cytomegalovirus  
348 infection post allogeneic stem cell transplantation. *Transpl Infect Dis* 9:102-107



- 349 16. Matsumoto K, Shigemi A, Ikawa K, Kanazawa N, Fujisaki Y, Morikawa N, Takeda  
350 Y (2015) Risk factors for ganciclovir-induced thrombocytopenia and leukopenia. *Biol*  
351 *Pharm Bull* 38:235-238
- 352 17. Simpson JD, Matthews GV, Brighton TA, Joseph JE (2016) Cytomegalovirus-  
353 associated thrombocytopenia treated with thrombopoietin receptor agonist. *Intern Med*  
354 *J* 46:1096-1099
- 355 18. Cinatl J, Cinatl J, Weber B, Rabenau H, Gumbel HO, Chenot JF, Scholz M, Encke  
356 A, Doerr HW (1995) In vitro inhibition of human cytomegalovirus replication in human  
357 foreskin fibroblasts and endothelial cells by ascorbic acid 2-phosphate. *Antiviral Res*  
358 27:405-418
- 359 19. Baer PC, Brzoska M, Geiger H (2011) Epithelial differentiation of human adipose-  
360 derived stem cells. *Methods Mol Biol* 702:289-298
- 361 20. Cinatl J Jr, Kotchetkov R, Scholz M, Cinatl J, Vogel JU, Driever PH, Doerr HW  
362 (1999) Human cytomegalovirus infection decreases expression of thrombospondin-1  
363 independent of the tumor suppressor protein p53. *Am J Pathol* 155:285-292
- 364 21. Vogel JU, Otte J, Koch F, Gumbel H, Doerr HW, Cinatl J Jr (2013) Role of human  
365 cytomegalovirus genotype polymorphisms in AIDS patients with cytomegalovirus  
366 retinitis. *Med Microbiol Immunol* 202:37-47
- 367 22. Michel D, Hohn S, Haller T, Jun D, Mertens T (2001) Aciclovir selects for  
368 ganciclovir-cross-resistance of human cytomegalovirus in vitro that is only in part  
369 explained by known mutations in the UL97 protein. *J Med Virol* 65:70-76
- 370 23. Michaelis M, Paulus C, Loschmann N, Dauth S, Stange E, Doerr HW, Nevels M,  
371 Cinatl J Jr (2011) The multi-targeted kinase inhibitor sorafenib inhibits human  
372 cytomegalovirus replication. *Cell Mol Life Sci* 68:1079-1090

- 373 24. Chou TC (2006) Theoretical basis, experimental design, and computerized  
374 simulation of synergism and antagonism in drug combination studies. *Pharmacol Rev*  
375 58:621-681
- 376 25. Matthys G, Park JW, McGuire S, Wire MB, Bowen C, Williams D, Jenkins J, Peng  
377 B (2011) Clinical pharmacokinetics, platelet response, and safety of eltrombopag at  
378 supratherapeutic doses of up to 200 mg once daily in healthy volunteers. *J Clin*  
379 *Pharmacol* 51:301-308
- 380 26. Wire MB, Fang L, Hussaini A, Kleha JF, Theodore D (2014) Lack of clinically  
381 significant pharmacokinetic interaction between the thrombopoietin receptor agonist  
382 eltrombopag and hepatitis C virus protease inhibitors boceprevir and telaprevir.  
383 *Antimicrob Agents Chemother* 58:6704-6709
- 384 27. Scholz M, Doerr HW, Cinatl J (2001) Inhibition of cytomegalovirus immediate early  
385 gene expression: a therapeutic option? *Antiviral Res* 49:129-145
- 386 28. Kaushansky K (2009) Molecular mechanisms of thrombopoietin signaling. *J*  
387 *Thromb Haemost* 7 Suppl 1:235-238
- 388 29. Erickson-Miller CL, Delorme E, Tian SS, Hopson CB, Landis AJ, Valoret EI, Sellers  
389 TS, Rosen J, Miller SG, Luengo JI, Duffy KJ, Jenkins JM (2009) Preclinical activity of  
390 eltrombopag (SB-497115), an oral, nonpeptide thrombopoietin receptor agonist. *Stem*  
391 *Cells* 27:424-430
- 392 30. Roth M, Will B, Simkin G, Narayanagari S, Barreyro L, Bartholdy B, Tamari R,  
393 Mitsiades CS, Verma A, Steidl U (2012) Eltrombopag inhibits the proliferation of  
394 leukemia cells via reduction of intracellular iron and induction of differentiation. *Blood*  
395 120:386-394
- 396 31. Vlachodimitropoulou E, Chen YL, Garbowski M, Koonyosying P, Psaila B, Sola-  
397 Visner M, Cooper N, Hider R, Porter J (2017) Eltrombopag: a powerful chelator of

- 398 cellular or extracellular iron(III) alone or combined with a second chelator. Blood  
399 130:1923-1933
- 400 32. Cinatl J Jr, Cinatl J, Rabenau H, Gumbel HO, Kornhuber B, Doerr HW (1994) In  
401 vitro inhibition of human cytomegalovirus replication by desferrioxamine. Antiviral Res  
402 25:73-77
- 403 33. Cinatl J Jr, Hoffmann F, Cinatl J, Weber B, Scholz M, Rabenau H, Stieneker F,  
404 Kabickova H, Blasko M, Doerr HW (1996) In vitro inhibition of human cytomegalovirus  
405 replication by calcium trisodium diethylenetriaminepentaacetic acid. Antiviral Res  
406 31:23-34
- 407 34. Kloover JS, Scholz M, Cinatl J Jr, Lautenschlager I, Grauls GE, Bruggeman CA  
408 (1999) Effect of desferrioxamine (DFO) and calcium trisodium  
409 diethylenetriaminepentaacetic acid (DTPA) on rat cytomegalovirus replication in vitro  
410 and in vivo. Antiviral Res 44:55-65
- 411 35. Martelius T, Scholz M, Krogerus L, Höckerstedt K, Loginov R, Bruggeman C, Cinatl  
412 J Jr, Doerr HW, Lautenschlager I (1999) Antiviral and immunomodulatory effects of  
413 desferrioxamine in cytomegalovirus-infected rat liver allografts with rejection.  
414 Transplantation 68:1753-1761
- 415 36. Vogel JU, Michaelis M, Neyts J, Blaheta RA, Snoeck R, Andrei G, De Clercq E,  
416 Rabenau HF, Kreuter J, Cinatl J Jr, Doerr HW (2002) Antiviral and immunomodulatory  
417 activity of the metal chelator ethylenediaminedisuccinic acid against cytomegalovirus  
418 in vitro and in vivo. Antiviral Res 55:179-188
- 419 37. Crowe WE, Maglova LM, Ponka P, Russell JM (2004) Human cytomegalovirus-  
420 induced host cell enlargement is iron dependent. Am J Physiol Cell Physiol  
421 287:C1023-1030

- 422 38. Michaelis M, Langer K, Arnold S, Doerr HW, Kreuter J, Cinatl J Jr (2004)  
423 Pharmacological activity of DTPA linked to protein-based drug carrier systems.  
424 *Biochem Biophys Res Commun* 323:1236-1240
- 425 39. Zvezdaryk KJ, Ferris MB, Strong AL, Morris CA, Bunnell BA, Dhurandhar NV,  
426 Gimble JM, Sullivan DE (2015) Human cytomegalovirus infection of human adipose-  
427 derived stromal/stem cells restricts differentiation along the adipogenic lineage.  
428 *Adipocyte* 5:53-64.
- 429 40. Craig JM, Macaulay JC, Weller TH, Wirth P (1957) Isolation of intranuclear  
430 inclusion producing agents from infants with illnesses resembling cytomegalic  
431 inclusion disease. *Proc Soc Exp Biol Med* 94:4-12
- 432 41. Plotkin SA, Furukawa T, Zygraich N, Huygelen C (1975) Candidate  
433 cytomegalovirus strain for human vaccination. *Infect Immun* 12:521-527
- 434 42. Cihlar T, Fuller MD, Cherrington JM (1998) Characterization of drug resistance-  
435 associated mutations in the human cytomegalovirus DNA polymerase gene by using  
436 recombinant mutant viruses generated from overlapping DNA fragments. *J Virol*  
437 72:5927-5936
- 438 43. Chou S, Marousek G, Bowlin TL (2012) Cyclopropavir susceptibility of  
439 cytomegalovirus DNA polymerase mutants selected after antiviral drug exposure.  
440 *Antimicrob Agents Chemother* 56:197-201
- 441 44. Baldanti F, Underwood MR, Talarico CL, Simoncini L, Sarasini A, Biron KK, Gerna  
442 G (1998) The Cys607-->Tyr change in the UL97 phosphotransferase confers  
443 ganciclovir resistance to two human cytomegalovirus strains recovered from two  
444 immunocompromised patients. *Antimicrob Agents Chemother* 42:444-446

- 445 45. Chou S, Ercolani RJ, Sahoo MK, Lefterova MI, Strasfeld LM, Pinsky BA (2014)  
446 Improved detection of emerging drug-resistant mutant cytomegalovirus  
447 subpopulations by deep sequencing. *Antimicrob Agents Chemother* 58:4697-4702
- 448 46. Lurain NS, Chou S (2010) Antiviral drug resistance of human cytomegalovirus.  
449 *Clin Microbiol Rev* 23:689-712
- 450 47. Chou S, Ercolani RJ, Vanarsdall AL (2017) Differentiated Levels of Ganciclovir  
451 Resistance Conferred by Mutations at Codons 591 to 603 of the Cytomegalovirus  
452 UL97 Kinase Gene. *J Clin Microbiol* 55:2098-2104
- 453 48. Chemaly RF, Hill JA, Voigt S, Peggs KS (2019) In vitro comparison of currently  
454 available and investigational antiviral agents against pathogenic human double-  
455 stranded DNA viruses: A systematic literature review. *Antiviral Res* 163:50-58
- 456 49. Yuan S, Chan JF, Ye ZW, Wen L, Tsang TG, Cao J, Huang J, Chan CC, Chik KK,  
457 Choi GK, Cai JP, Yin F, Chu H, Liang M, Jin DY, Yuen KY (2019) Screening of an  
458 FDA-Approved Drug Library with a Two-Tier System Identifies an Entry Inhibitor of  
459 Severe Fever with Thrombocytopenia Syndrome Virus. *Viruses* 2019; 11: pii: E385.
- 460 50. Sun Y, Bao Q, Xuan B, Xu W, Pan D, Li Q, Qian Z (2018) Human Cytomegalovirus  
461 Protein pUL38 Prevents Premature Cell Death by Binding to Ubiquitin-Specific  
462 Protease 24 and Regulating Iron Metabolism. *J Virol* 92:pii:e00191-18
- 463
- 464

465 **Figure legends**

466

467 **Figure 1.** Effects of eltrombopag on HCMV late antigen (LA) expression in primary  
468 human foreskin fibroblasts (HFFs). A) Representative dose response curves showing  
469 the effects of eltrombopag on HCMV LA expression and HFF viability (as determined  
470 after 120h of incubation). Eltrombopag concentrations that reduce HCMV LA  
471 expression by 50% ( $IC_{50}$ ) and the viability of proliferating HFFs by 50% ( $CC_{50}$ ) relative  
472 to untreated controls are also provided. Eltrombopag was continuously present from  
473 the time of virus infection. B) Representative photographs and Western blots  
474 demonstrating the effects of eltrombopag on HCMV LA expression. In A) and B), HFFs  
475 were infected with HCMV strain Hi91 (MOI 0.02). HCMV late antigen (LA) expression  
476 was detected 120h post infection. C) Representative dose-response curves and  $IC_{50}$   
477 values indicating effects of eltrombopag on HCMV LA expression in HFFs infected  
478 with different MOIs of HCMV strain Hi91 as detected 120h post infection.

479

480 **Figure 2.** Effects of eltrombopag on HCMV replication and at different stages of the  
481 viral replication cycle. HFFs were infected with HCMV strain Hi91 (MOI 0.02). HCMV  
482 late antigen (LA) expression and virus titres were detected 120h post infection. A)  
483 Virus titres in the absence or presence of eltrombopag. B) Representative dose-  
484 response curves and  $IC_{50}$  values indicating the effects of eltrombopag on  
485 HCMV LA expression after 24h of pre-treatment, after treatment during the 1h  
486 adsorption period, after drug addition post infection following the 1h virus adsorption  
487 period, after drug addition 24h post infection, and after drug addition 48h post infection.

488

489 **Figure 3.** Eltrombopag inhibits HCMV infection by iron depletion. A) Representative  
490 dose response curve indicating the effects of eltrombopag on cytopathogenic effect  
491 (CPE) formation (detected 120h post infection) in murine cytomegalovirus (MOI 1)-  
492 infected murine NIH/3T3 fibroblasts and eltrombopag concentration that reduces CPE  
493 formation by 50% (IC<sub>50</sub>) relative to untreated control. The findings indicate that  
494 eltrombopag interferes with cytomegalovirus replication by thrombopoietin receptor-  
495 independent effects, since eltrombopag does not activate the murine thrombopoietin  
496 receptor. The investigated eltrombopag concentrations did not affect NIH/3T3 cell  
497 viability. B) Representative growth curve indicating the effects of equimolar  
498 concentrations of Fe(III)Cl<sub>3</sub> on the anti-HCMV effects of eltrombopag as indicated by  
499 HCMV LA expression in HCMV Hi91 (MOI 0.02)-infected human foreskin fibroblasts  
500 (HFFs) 120h post infection. Equimolar Fe(III)Cl<sub>3</sub> concentrations circumvent the anti-  
501 HCMV effects exerted by eltrombopag.

502

503 **Figure 4.** Antiviral effects of eltrombopag in combination with ganciclovir. A) Effects of  
504 equimolar drug concentrations on HCMV LA expression in HCMV Hi91 (MOI 0.02)-  
505 infected human foreskin fibroblasts (HFFs) 120h post infection. \*P < 0.05 compared  
506 to either single treatment; B) Combination indices (CIs) at different levels of inhibition  
507 and weighted average CI values (CI<sub>wt</sub>) calculated as  $(CI_{50} + 2 \times CI_{75} + 3 \times CI_{90} + 4 \times$   
508  $CI_{95}) / 10$  [24]. CI<sub>wt</sub> values  $\leq 0.7$  indicate synergistic effects [24].

509

510 **Figure 5.** Antiviral effects of eltrombopag determined in different cell types infected by  
511 different human cytomegalovirus (HCMV) strains and clinical isolates. Human foreskin  
512 fibroblasts (HFFs) were infected at an MOI of 0.02 and adipose-derived adult  
513 mesenchymal stem cells (ASCs) at an MOI of 5. HCMV late antigen (LA) expression

514 was determined 120h post infection. A) Eltrombopag concentrations that reduce  
515 HCMV LA expression by 50% (IC<sub>50</sub>). Numerical values are provided in Suppl. Table  
516 2. The investigated eltrombopag concentrations did not affect cell viability. B) Average  
517 eltrombopag IC<sub>50</sub>s for each virus strain and isolate in HFFs and ASCs. C) Average  
518 eltrombopag IC<sub>50</sub>s across virus strains and isolates in HFFs and ASCs. D)  
519 Representative growth curve indicating the effects of equimolar concentrations of  
520 Fe(III)Cl<sub>3</sub> on the anti-HCMV effects of eltrombopag as indicated by HCMV LA  
521 expression in U1 (MOI 0.02)-infected HFFs 120h post infection.

522

523



## Figure 1

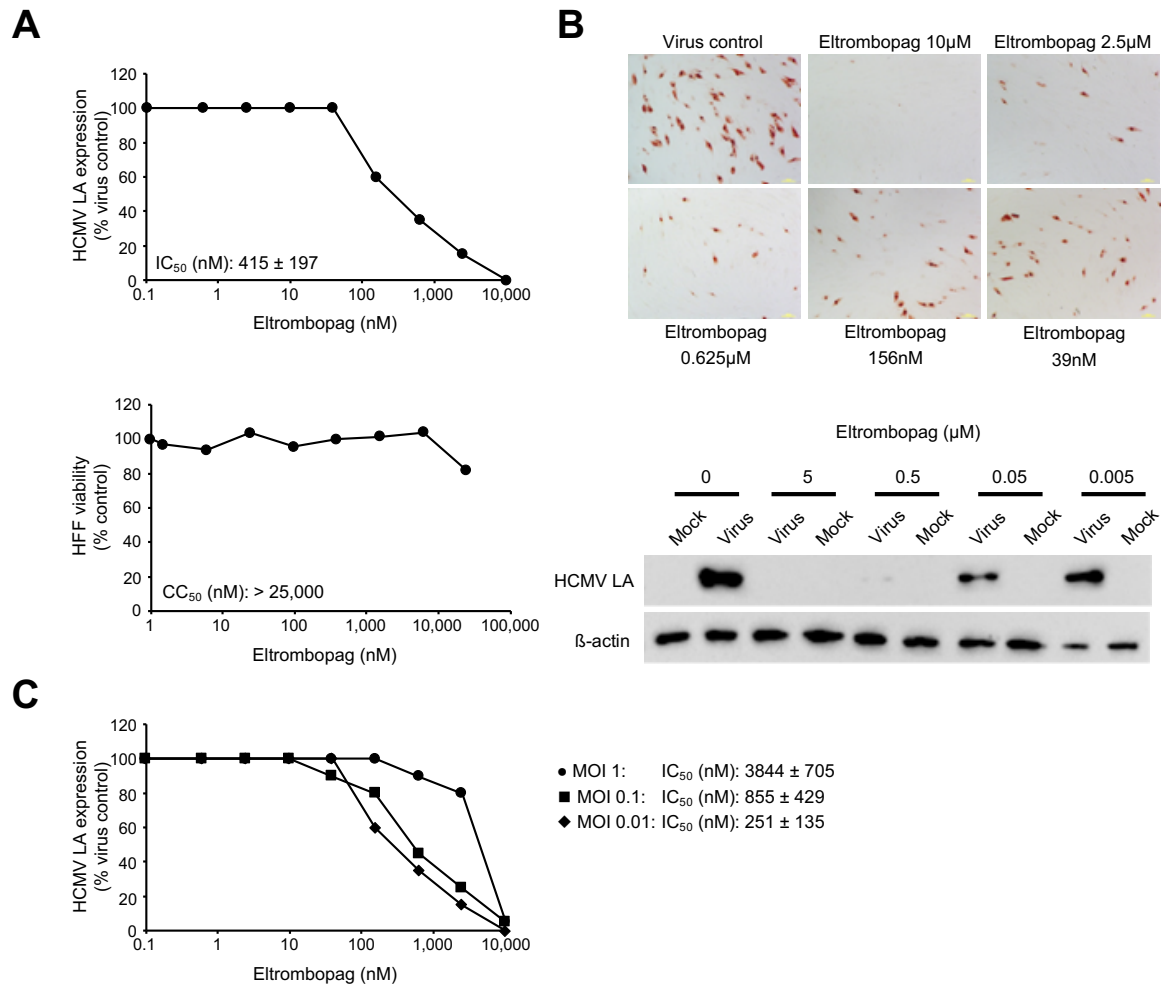

524

525

**Figure 2**

**A**

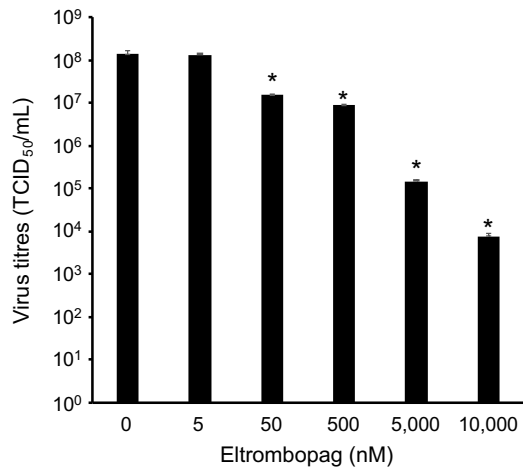

**B**

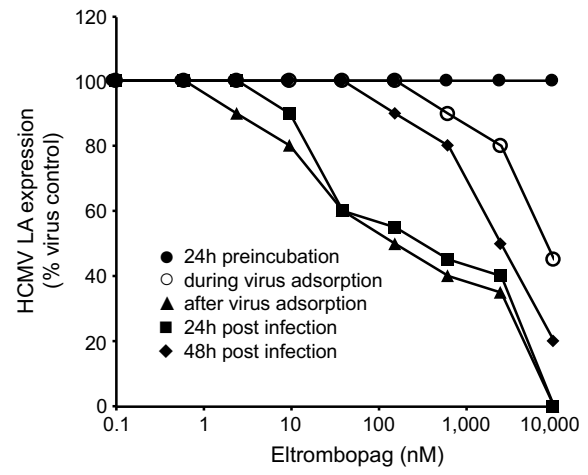

526

527

## Figure 3

**A**

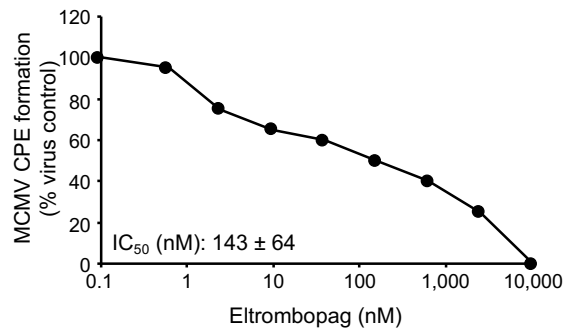

**B**

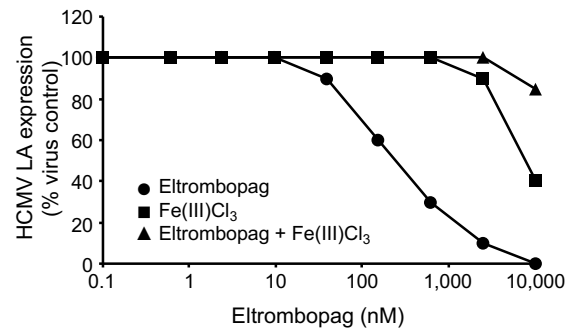

528

529

## Figure 4

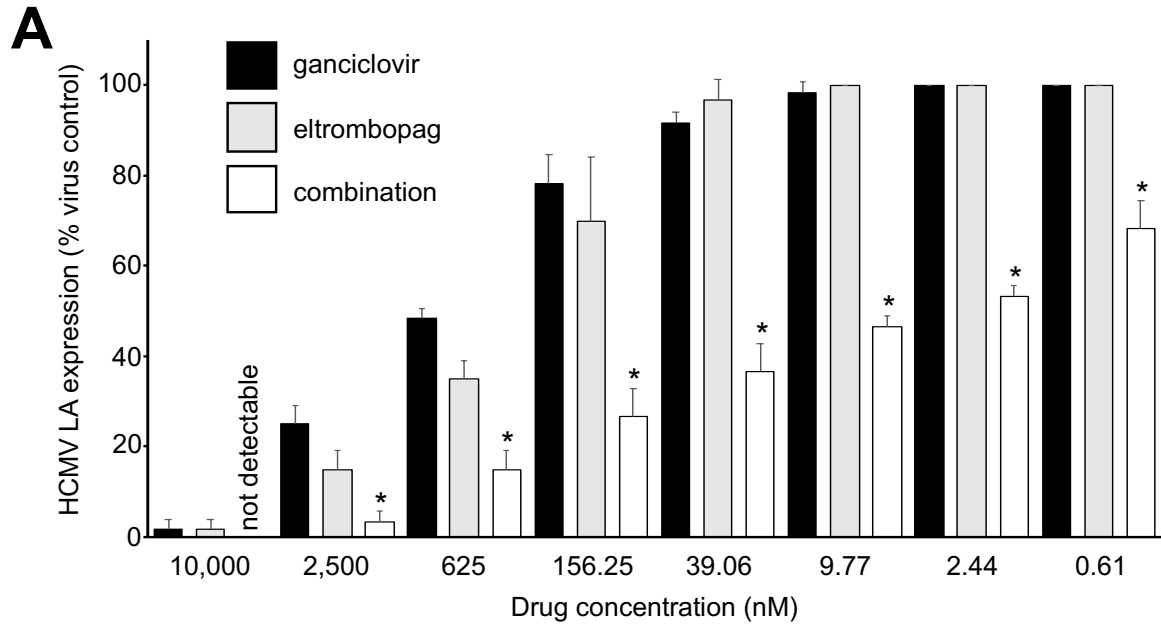

**B**

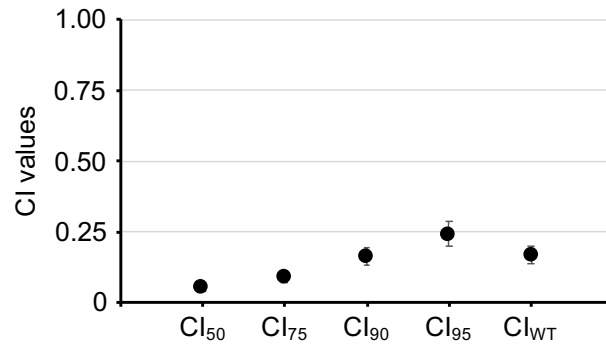

530

531

## Figure 5

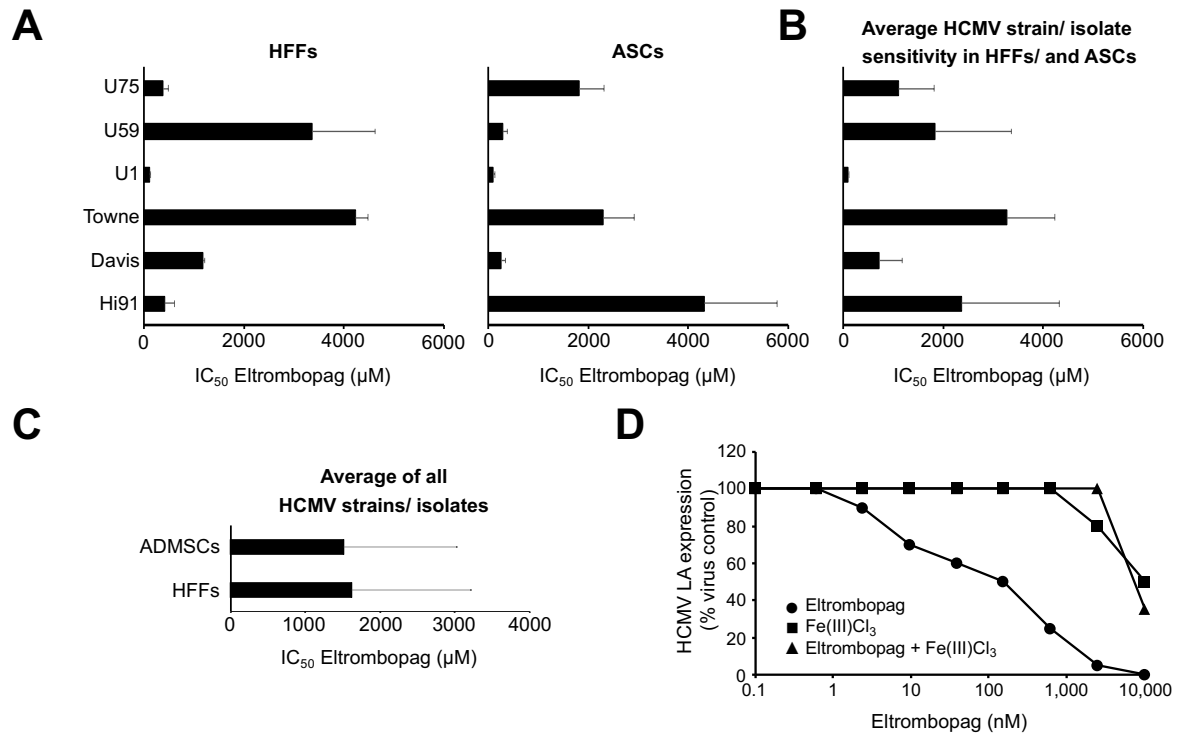

532

533
