# **The thrombopoietin receptor agonist eltrombopag inhibits human cytomegalovirus replication via iron chelation**

Jens-Uwe Vogel<sup>1</sup>, Sophie Schmidt<sup>1</sup>, Daniel Schmidt<sup>1</sup>, Florian Rothweiler<sup>1</sup>, Benjamin Koch<sup>2</sup>, Patrick C. Baer<sup>2</sup>, Holger F. Rabenau<sup>1</sup>, Detlef Michel<sup>3</sup>, Thomas Stamminger<sup>3</sup>, Martin Michaelis<sup>4\*</sup>, Jindrich Cinatl Jr<sup>1\*</sup>

<sup>1</sup> Institut für Medizinische Virologie, Klinikum der Goethe-Universität, Frankfurt am Main, Germany

<sup>2</sup> Medizinische Klinik III, Nephrologie, Klinikum der Goethe-Universität, Frankfurt am Main, Germany

<sup>3</sup> Institut für Virologie, Universitätsklinikum Ulm, Germany

<sup>4</sup> School of Biosciences, University of Kent, Canterbury, UK

## **\* correspondence:**

Jindrich Cinatl jr. Institut für Medizinische Virologie, Klinikum der Goethe-Universität, Paul Ehrlich-Straße 40, 60596 Frankfurt am Main, Germany

phone +49 69 67 86 65-72; fax +49 69 67 86-9172; e-mail: cinatl@em.uni-frankfurt.de

Martin Michaelis, School of Biosciences, University of Kent, Canterbury CT2 7NJ, UK

phone +44 1227 82-7804; fax +44 1227 82-4034; m.michaelis@kent.ac.uk (MM)

## **Acknowledgements**

The work was supported by the Hilfe für krebskranke Kinder Frankfurt e.V. and the Frankfurter Stiftung für krebskranke Kinder.

## Abstract

The thrombopoietin receptor agonist eltrombopag was successfully used against human cytomegalovirus (HCMV)-associated thrombocytopenia refractory to immunomodulatory and antiviral drugs. These effects were ascribed to effects of eltrombopag on megakaryocytes. Here, we tested whether eltrombopag may also exert direct antiviral effects. Therapeutic eltrombopag concentrations inhibited HCMV replication in human fibroblasts and adult mesenchymal stem cells infected with six different virus strains and drug-resistant clinical isolates. Eltrombopag also synergistically increased the anti-HCMV activity of the mainstay drug ganciclovir. Time-of-addition experiments suggested that eltrombopag interferes with HCMV replication after virus entry. Eltrombopag was effective in thrombopoietin receptor-negative cells, and addition of  $\text{Fe}^{3+}$  prevented the anti-HCMV effects, indicating that it inhibits HCMV replication via iron chelation. This may be of particular interest for the treatment of cytopenias after haematopoietic stem cell transplantation, as HCMV reactivation is a major reason for transplantation failure. Since therapeutic eltrombopag concentrations are effective against drug-resistant viruses and synergistically increase the effects of ganciclovir, eltrombopag is also a drug repurposing candidate for the treatment of therapy-refractory HCMV disease.

**Key words:** human cytomegalovirus, antiviral therapy, eltrombopag, thrombopoietin receptor agonist, drug resistance, iron chelation

## Introduction

Eltrombopag is a thrombopoietin receptor (also known as c-Mpl or MPL) agonist that is used for the treatment of thrombocytopenia [1-3]. Its use has also been suggested for the treatment of cytopenias after haematopoietic stem cell transplantations and case reports support its safety and efficacy [4-9].

Human cytomegalovirus (HCMV) reactivation and HCMV-associated disease are leading reasons for the failure of haematopoietic stem cell transplantations [10-12]. Anti-HCMV drugs including ganciclovir, cidofovir, and foscarnet are available, but their use is associated with severe side effects [13]. In particular, the use of ganciclovir (and its prodrug valganciclovir), the mainstay treatment for cytomegalovirus disease, is associated with severe haematological side effects including thrombocytopenia [14-16].

A case report described the use of eltrombopag in an immunocompetent patient who suffered from human cytomegalovirus (HCMV)-associated thrombocytopenia [17]. Immunosuppressive treatment for thrombocytopenia (prednisone, intravenous immunoglobulin, dapsone) in combination with antiviral therapy (ganciclovir/valganciclovir, HCMV hyperimmune globulin) only resulted in a temporary platelet response with subsequent relapse. A change to eltrombopag intended to increase platelet counts without immunosuppressive therapy resulted in a durable increase in platelet levels, no evidence of HCMV viraemia, and the resolution of symptoms [17]. The observed effects were attributed to eltrombopag overcoming HCMV-induced suppression of platelet production [17]. However, we hypothesised that direct antiviral effects may also have contributed to the beneficial outcome in the case report of the patient with HCMV-associated thrombocytopenia [17]. Indeed, we found that eltrombopag exerts anti-HCMV effects via iron chelation.

## Materials and Methods

### Drugs

Eltrombopag (as its orally active ethanolamine salt eltrombopag olamine) was purchased from Selleck Chemicals (via Absource Diagnostics GmbH, Munich Germany), deferasirox and ganciclovir from MedChemExpress (via Hycultec, Beutelsbach, Germany), and cidofovir from Cayman Chemical (via Biomol GmbH, Hamburg, Germany).

### Cells and viruses

Primary human foreskin fibroblasts (HFFs) and adipose-derived adult mesenchymal stem cells (ASCs) were cultivated as previously described [18,19].

The wild type HCMV strain Hi91 was isolated from the urine of an AIDS patient with HCMV retinitis as described previously [20]. HCMV strains Davis and Towne were received from ATCC (Manassas, VA, USA). Virus stocks were prepared in HFFs maintained in minimal essential medium (MEM) supplemented with 4% FCS. U1, U59, and U75 are patient isolates, which were isolated as previously described [20,21]. Virus stocks were prepared in HFFs maintained in minimal essential medium (MEM) supplemented with 4% FCS.

Murine cytomegalovirus (Smith strain, catalogue number VR-1399) was obtained from ATCC and cultivated in NIH/3T3 mouse fibroblasts (ATCC).

DNA isolation, amplification, and sequencing were performed as previously described [21], using established primers [22].

## **Virus infectivity assay**

In 96-well microtiter plates, confluent cultures of HFFs or ASCs cells were incubated with HCMV at the indicated multiplicities of infection (MOIs). After incubation for one hour, cells were washed with PBS and incubated in MEM containing 4% FCS and serial dilutions of the indicated substances.

As described previously [18,23], cells producing HCMV specific antigens were detected 24h post infection by immunoperoxidase staining using monoclonal antibodies directed against the UL123-coded 72 kDa immediate early antigen 1 (IEA1) (Mouse Anti CMV IEA, MAB8131, Millipore, Temecula, CA, USA) and 120h post-infection by immunoperoxidase staining using monoclonal antibodies directed against UL55-encoded late antigen gB (LA) (kindly provided by K. Radsak, Institut für Virologie, Marburg, Germany) as previously described. Drug concentrations that reduced HCMV antigen expression by 50% (IC<sub>50</sub>) were calculated using Calcsyn (Biosoft, Cambridge, United Kingdom).

## **Drug combination studies**

Drugs were combined at equimolar concentrations and single agent as well as combined effects were determined by staining for HCMV LA. Combination indices (CIs) were calculated at different levels of inhibition (50% inhibition, CI<sub>50</sub>; 75% inhibition, CI<sub>75</sub>; 90% inhibition, CI<sub>90</sub>; 95% inhibition, CI<sub>95</sub>) by the method of Chou and Talalay [24] using CalcuSyn software version 1.0 (Biosoft, Cambridge, United Kingdom). Weighted average CI values (CI<sub>wt</sub>) were calculated as  $(CI_{50} + 2 \times CI_{75} + 3 \times CI_{90} + 4 \times CI_{95}) / 10$ . CI<sub>wt</sub> values  $\leq 0.7$  indicate synergistic effects, CI<sub>wt</sub> values  $> 0.7$  and  $\leq 0.9$  moderately synergistic effects, CI<sub>wt</sub> values  $> 0.9$  and  $\leq 1.2$  additive effects, CI<sub>wt</sub>

values  $>1.2$  and  $\leq 1.45$  moderately antagonistic effects, and  $CI_{wt}$  values  $>1.45$  antagonistic effects [24].

## **Viability assay**

Cell viability was assessed using the 3-(4,5-dimethylthiazol-2-yl)-2,5-diphenyltetrazolium bromide (MTT) dye reduction assay as described previously [23]. Confluent cell cultures in 96-well microtiter plates were incubated with culture medium containing serial dilutions of the indicated substances. After five days of incubation MTT (1 mg/ml) was added and after an additional four hours, cells were lysed in a buffer containing 20% (w/v) SDS and 50% N,N-dimethylformamide adjusted to pH 4.5. Absorbance was determined at 570 nm for each well using a 96-well multiscanner. After subtracting background absorbance, cell viability was expressed in per cent relative to untreated control cells. Drug concentrations that reduced cell viability by 50% ( $CC_{50}$ ) were calculated using CalcuSyn (Biosoft, Cambridge, United Kingdom).

## **Virus yield assay**

The amount of infectious virus was determined by virus yield assay in a single-cycle assay format as previously described [23]. Virus titres were expressed as 50% of tissue culture infectious dose ( $TCID_{50}$ / mL) 120 h post infection.

## **Immunoblotting**

Immunoblotting was performed as described previously [23]. In brief, cells were lysed in Triton X-100 sample buffer and proteins separated by sodium dodecyl sulfate (SDS) SDS-PAGE. Proteins were detected using specific antibodies against  $\beta$ -actin (3598R-100-BV, BioVision via BioCat, Heidelberg, Germany) or HCMV 45 kDa late

antigen (MBS320051, MyBioSource via Biozol, Echingen, Germany) and were visualized by enhanced chemiluminescence using a commercially available kit (Thermo Scientific, Schwerte, Germany).

## Statistics

Values presented are the mean  $\pm$  S.D. of three independent biological repeats. Comparisons between two groups were performed using Student's t-test, three and more groups were compared by ANOVA followed by the Student-Newman-Keuls test. Data groups were considered significantly different at  $P < 0.05$ .

## Results

### **Eltrombopag inhibits HCMV replication in human foreskin fibroblasts by interference with late processes of the replication cycle**

Eltrombopag did not affect HCMV Hi91-induced immediate early antigen (IEA) expression, but inhibited HCMV Hi91-induced late antigen (LA) expression with an  $IC_{50}$  of 415 nM in HFFs (Figure 1A, 1B). Eltrombopag concentrations of up to 25 $\mu$ M did not reduce the viability of confluent or proliferating HFFs by 50%. Hence, the selectivity index  $CC_{50}/IC_{50}$  is higher than 60.2 (Figure 1A). Higher multiplicities of infection (MOIs) were associated with higher  $IC_{50}$  values (Figure 1C). At MOI 1, the highest MOI investigated in HFFs, the eltrombopag  $IC_{50}$  was 3844 nM. The observed eltrombopag concentrations are within the range of therapeutic plasma concentrations which have been described to exceed 45 $\mu$ M [25,26].

Eltrombopag-induced inhibition of HCMV LA translated into reduced virus replication as indicated by virus yield assay (Figure 2A). At a concentration of 10 $\mu$ M, eltrombopag reduced virus titres by  $1.8 \times 10^4$ -fold and at 500nM still by 15-fold.

The HCMV replication cycle is divided into three phases characterised by the expression of immediate early, delayed early, and late viral genes. Immediate early genes are transcribed immediately after infection and do not depend on synthesis of viral DNA or transcription of proteins. Delayed early proteins are represented by the viral DNA polymerase and other viral functions required for viral DNA synthesis and some viral structural proteins. Late genes encode mostly structural proteins used in viral assembly and packaging, and are generally expressed subsequent to delayed early genes [27].



To better define which phases of the viral replication cycle are affected by eltrombopag, the drug was added at different time points (Figure 2B, Suppl. Table 1). Pre-incubation and drug addition during the one-hour virus adsorption period did not or only modestly affect virus replication. This shows that eltrombopag does not primarily interfere with virus binding to host cells and virus internalisation but needs to be present during virus replication to exert its anti-HCMV effects. Drug addition one hour or 24h post infection was sufficient to achieve maximum inhibition of HCMV LA expression (Figure 2B, Suppl. Table 1). This, together with the observed lack of inhibition of HCMV IEA expression, indicates that eltrombopag inhibits the late stages of the HCMV replication cycle characterised by LA expression. Drug addition 48h post infection resulted in reduced effects compared to drug addition one hour or 24h post infection (Figure 2B, Suppl. Table 1).

### **Eltrombopag inhibits HCMV expression via iron chelation**

Eltrombopag was developed as thrombopoietin receptor agonist [1-3]. However, it is unlikely that eltrombopag inhibits HCMV replication via thrombopoietin receptor activation, because fibroblasts do not express the thrombopoietin receptor [28]. In agreement, eltrombopag also inhibited murine cytomegalovirus replication in murine NIH/3T3 fibroblasts (Figure 3A), although eltrombopag does not target the murine thrombopoietin receptor [29].

Eltrombopag is also an iron chelator [2,30,31], and iron chelators have been shown to inhibit HCMV replication [32-38]. The addition of equimolar  $\text{Fe}^{3+}$  concentrations was shown to inhibit pharmacological action of eltrombopag that are caused via iron chelation [31]. Hence, we investigated eltrombopag in combination with equimolar  $\text{Fe(III)Cl}_3$  concentrations to investigate whether iron chelation is the

mechanism by which eltrombopag exerts its anti-HCMV effects (Figure 3B). Since equimolar Fe(III)Cl<sub>3</sub> concentrations prevented the anti-HCMV effects of eltrombopag (Figure 3B), we concluded that iron chelation is the main mechanism of eltrombopag's anti-HCMV activity.

## **Eltrombopag exerts synergistic effects with ganciclovir**

Next, we tested eltrombopag in combination with ganciclovir, the mainstay of anti-HCMV therapies [13]. The combination of equimolar eltrombopag and ganciclovir concentrations resulted in synergistic anti-HCMV effects (Figure 4), which is illustrated by a weighted average combination index (CI<sub>WT</sub>) of  $0.17 \pm 0.03$  as determined by the method of Chou and Talalay [24]. According to this method, combined effects are considered to be synergistic at a CI<sub>WT</sub> for <0.7 [24].

## **Eltrombopag is effective in different cell types and against different virus strains and isolates including drug-resistant ones**

Finally, we investigated the effects of eltrombopag against a broader range of laboratory virus strains and clinical isolates in HFFs and primary adipose-derived adult mesenchymal stem cells (ASCs), another cell type that supports HCMV replication [39]. The laboratory HCMV strains included Davis [40] and Towne [41] in addition to Hi91. The clinical isolates U1, U59, and U75 were isolated from the urine of patients as previously described [20,21]. U1 and U59 harbour a A987G mutation in the HCMV DNA polymerase UL54 (Table 1), which is known to confer combined ganciclovir and cidofovir resistance [42,43]. U1 also displays a C607Y mutation in the HCMV kinase UL97 (Table 1), which is associated with ganciclovir resistance [44,45]. In agreement, U1 and U59 were characterised by high ganciclovir and cidofovir IC<sub>50</sub>s (Table 1), which

are typically considered to indicate resistance [46-48]. U75 also displayed resistance to ganciclovir and cidofovir (Table 1), although it does not harbour known resistance mutations.

The eltrombopag IC<sub>50</sub>s ranged from 99nM (U1 in HFFs) to 4331nM (Hi91 in ASCs) (Figure 5A, Suppl. Table 2). When compared across the two cell types, the different HCMV strains and clinical isolates displayed similar eltrombopag sensitivity, apart from U1, which appeared to be particularly sensitive to eltrombopag in HFFs and ASCs (Figure 5B). The average HCMV sensitivity to eltrombopag was very similar in both cell types (Figure 5C).

To confirm the relevance of iron chelation as mechanism of the anti-HCMV action of eltrombopag using a clinical virus isolate, U1-infected HFFs were treated with equimolar concentrations of eltrombopag and Fe(III)Cl<sub>3</sub>. The presence of equimolar Fe<sup>3+</sup> concentrations prevented the eltrombopag-induced inhibition of HCMV LA expression in U1-infected cells in a comparable fashion (Figure 5D) as in Hi91-infected cells (Figure 3B).

## Discussion

Here, we show that the approved thrombopoietin receptor agonist eltrombopag exerts anti-HCMV effects in various cell types infected with a range of different virus strains and clinical isolates including drug-resistant ones. The observed IC<sub>50</sub> values ranged from 99nM to 4331nM, which is in the range of therapeutic plasma concentrations that have been reported to exceed 45µM [25,26]. Eltrombopag also synergistically increased the activity of the approved anti-HCMV drug ganciclovir.

Our findings are in agreement with a case report on an immunocompetent patient, who suffered from HCMV-associated thrombocytopenia and recovered after eltrombopag therapy [17]. This response had originally been attributed to effects of eltrombopag on platelet production [17]. The possibility that eltrombopag may exert antiviral effects was not considered. Our current data show that therapeutic eltrombopag levels interfere with HCMV replication, which may have contributed to the beneficial clinical outcome. Notably, eltrombopag has also been shown to inhibit the replication of severe fever with thrombocytopenia syndrome virus, a member of the genus Banyangvirus (Phenuiviridae) [49].

The anti-HCMV effects of eltrombopag are unlikely to be caused by action on the thrombopoietin receptor, since eltrombopag was effective in cell types that do not express the thrombopoietin receptor, which is expressed in haematopoietic cells [28,29]. In agreement, eltrombopag also exerted antiviral effects in mouse fibroblasts infected with murine CMV, although the haematological effects of eltrombopag are known to be species-specific and to not affect mice [28,29].

Eltrombopag is also known to be an iron chelator [30,31]. Addition of Fe<sup>3+</sup> prevented the eltrombopag-mediated anti-HCMV effects in strain Hi91- and clinical

isolate U1-infected cells. Hence, our data suggest that eltrombopag inhibits HCMV replication via  $\text{Fe}^{3+}$  chelation.

A number of different iron chelators including desferrioxamine, diethylenetriaminepentaacetic acid (DTPA), and ethylenediaminedisuccinic acid (EDDS) were shown to inhibit HCMV replication [32-38]. However, the iron chelators tiron and ciclopirox olamine were not found to inhibit HCMV strain AD169 replication in MRC5 cells [50]. The experimental set-up differed, as MRC5 cells were infected at a high MOI of 3 and no dose-response relationships were determined. Hence, a direct comparison is not possible. Notably, specific antiviral activity can easily be missed if the therapeutic window between antiviral and cytotoxic effects is relatively small. For example, desferrioxamine was found to inhibit HCMV replication at concentrations that did not decrease the viability of confluent fibroblasts but affected dividing cells [32]. In contrast, eltrombopag inhibits HCMV replication in concentrations that do not affect cell proliferation. Hence, the size of the therapeutic window that discriminates between anti-HCMV activity and antiproliferative and cytotoxic effects substantially differs among iron chelators, and eltrombopag seems to be an iron chelator that possesses a particularly preferential therapeutic window in terms of its anti-HCMV activity.

Eltrombopag has been suggested for the treatment of cytopenias after haematopoietic stem cell transplantations and case reports support its safety and efficacy [4-9]. Since HCMV reactivation and HCMV-associated disease are leading reasons for the failure of haematopoietic stem cell transplantations [10-12], antiviral effects exerted by eltrombopag may also contribute to improved therapy outcome. Notably, eltrombopag was effective against resistant clinical HCMV isolates, and resistance formation to the approved drugs is a major challenge after stem cell transplantation [11,12].

In conclusion, therapeutic eltrombopag concentrations inhibit HCMV replication via chelation of Fe<sup>3+</sup> ions. Eltrombopag is effective against drug-resistant viruses and synergistically increases the effects of the mainstay anti-HCMV drug ganciclovir. The anti-HCMV activity of eltrombopag may be of particular interest for its use for the treatment of cytopenias after haematopoietic stem cell transplantation, as HCMV reactivation and disease is a major reason for transplantation failure.

# References

1. Gill H, Wong RSM, Kwong YL (2017) From chronic immune thrombocytopenia to severe aplastic anemia: recent insights into the evolution of eltrombopag. *Ther Adv Hematol* 8:159-174
2. Scheinberg P (2018) Activity of eltrombopag in severe aplastic anemia. *Blood Adv* 2:3054-3062
3. Ghanima W, Cooper N, Rodeghiero F, Godeau B, Bussel JB (2019) Thrombopoietin receptor agonists: ten years later. *Haematologica* 104:1112-1123
4. Master S, Dwary A, Mansour R, Mills GM, Koshy N (2018) Use of Eltrombopag in Improving Poor Graft Function after Allogeneic Hematopoietic Stem Cell Transplantation. *Case Rep Oncol* 11:191-195
5. Tang C, Chen F, Kong D, Ma Q, Dai H, Yin J, Li Z, Chen J, Zhu X, Mao X, Wu D, Tang X (2018) Successful treatment of secondary poor graft function post allogeneic hematopoietic stem cell transplantation with eltrombopag. *J Hematol Oncol* 11:103
6. Fu H, Zhang X, Han T, Mo X, Wang Y, Chen H, Han W, Wang J, Wang F, Yan C, Zhang Y, Sun Y, Liu K, Huang X, Xu L (2019) Eltrombopag is an effective and safe therapy for refractory thrombocytopenia after haploidentical hematopoietic stem cell transplantation. *Bone Marrow Transplant* 54:1310-1318
7. Guenther KL, Cheruku PS, Cash A, Smith RH, Alvarado LJ, Burkett S, Townsley DM, Winkler T, Larochelle A (2019) Eltrombopag promotes DNA repair in human hematopoietic stem and progenitor cells. *Exp Hematol* 73:1-6.e6
8. Marotta S, Marano L, Ricci P, Cacace F, Frieri C, Simeone L, Trastulli F, Vitiello S, Cardano F, Pane F, Risitano AM (2019) Eltrombopag for post-transplant cytopenias due to poor graft function. *Bone Marrow Transplant* 54:1346-1353

325 9. Rivera D, Bastida JM, Lopez-Corral L, Sanchez-Guijo F, Cabrero M, Martin A, Perez  
326 E, Lopez-Parra M, Avendaño A, Veiga A, Baile M, Arratibel N, Carrillo J, Vazquez L,  
327 Caballero MD, Gonzalez-Porras JR (2019) Usefulness of eltrombopag for treating  
328 thrombocytopenia after allogeneic stem cell transplantation. Bone Marrow Transplant  
329 54:757-761.

330 10. Cho SY, Lee DG, Kim HJ (2019) Cytomegalovirus Infections after Hematopoietic  
331 Stem Cell Transplantation: Current Status and Future Immunotherapy. Int J Mol Sci  
332 20:pii: E2666

333 11. Ljungman P, de la Camara R, Robin C, Crocchiolo R, Einsele H, Hill JA, Hubacek  
334 P, Navarro D, Cordonnier C, Ward KN; 2017 European Conference on Infections in  
335 Leukaemia group (2019) Guidelines for the management of cytomegalovirus infection  
336 in patients with haematological malignancies and after stem cell transplantation from  
337 the 2017 European Conference on Infections in Leukaemia (ECIL 7). Lancet Infect Dis  
338 19:e260-e272

339 12. Pande A, Dubberke ER (2019) Cytomegalovirus Infections of the Stem Cell  
340 Transplant Recipient and Hematologic Malignancy Patient. Infect Dis Clin North Am  
341 33:485-500

342 13. Britt WJ, Prichard MN (2018) New therapies for human cytomegalovirus infections.  
343 Antiviral Res 159:153-174

344 14. McGavin JK, Goa KL (2001) Ganciclovir: an update of its use in the prevention of  
345 cytomegalovirus infection and disease in transplant recipients. Drugs 61:1153-1183

346 15. Busca A, de Fabritiis P, Ghisetti V, Alice T, Mirabile M, Gentile G, Locatelli F,  
347 Falda M (2007) Oral valganciclovir as preemptive therapy for cytomegalovirus  
348 infection post allogeneic stem cell transplantation. Transpl Infect Dis 9:102-107



16. Matsumoto K, Shigemi A, Ikawa K, Kanazawa N, Fujisaki Y, Morikawa N, Takeda Y (2015) Risk factors for ganciclovir-induced thrombocytopenia and leukopenia. *Biol Pharm Bull* 38:235-238
17. Simpson JD, Matthews GV, Brighton TA, Joseph JE (2016) Cytomegalovirus-associated thrombocytopenia treated with thrombopoietin receptor agonist. *Intern Med J* 46:1096-1099
18. Cinatl J, Cinatl J, Weber B, Rabenau H, Gmbel HO, Chenot JF, Scholz M, Encke A, Doerr HW (1995) In vitro inhibition of human cytomegalovirus replication in human foreskin fibroblasts and endothelial cells by ascorbic acid 2-phosphate. *Antiviral Res* 27:405-418
19. Baer PC, Brzoska M, Geiger H (2011) Epithelial differentiation of human adipose-derived stem cells. *Methods Mol Biol* 702:289-298
20. Cinatl J Jr, Kotchetkov R, Scholz M, Cinatl J, Vogel JU, Driever PH, Doerr HW (1999) Human cytomegalovirus infection decreases expression of thrombospondin-1 independent of the tumor suppressor protein p53. *Am J Pathol* 155:285-292
21. Vogel JU, Otte J, Koch F, Gmbel H, Doerr HW, Cinatl J Jr (2013) Role of human cytomegalovirus genotype polymorphisms in AIDS patients with cytomegalovirus retinitis. *Med Microbiol Immunol* 202:37-47
22. Michel D, Hhn S, Haller T, Jun D, Mertens T (2001) Aciclovir selects for ganciclovir-cross-resistance of human cytomegalovirus in vitro that is only in part explained by known mutations in the UL97 protein. *J Med Virol* 65:70-76
23. Michaelis M, Paulus C, Lschmann N, Dauth S, Stange E, Doerr HW, Nevels M, Cinatl J Jr (2011) The multi-targeted kinase inhibitor sorafenib inhibits human cytomegalovirus replication. *Cell Mol Life Sci* 68:1079-1090

24. Chou TC (2006) Theoretical basis, experimental design, and computerized simulation of synergism and antagonism in drug combination studies. *Pharmacol Rev* 58:621-681
25. Matthys G, Park JW, McGuire S, Wire MB, Bowen C, Williams D, Jenkins J, Peng B (2011) Clinical pharmacokinetics, platelet response, and safety of eltrombopag at supratherapeutic doses of up to 200 mg once daily in healthy volunteers. *J Clin Pharmacol* 51:301-308
26. Wire MB, Fang L, Hussaini A, Kleha JF, Theodore D (2014) Lack of clinically significant pharmacokinetic interaction between the thrombopoietin receptor agonist eltrombopag and hepatitis C virus protease inhibitors boceprevir and telaprevir. *Antimicrob Agents Chemother* 58:6704-6709
27. Scholz M, Doerr HW, Cinatl J (2001) Inhibition of cytomegalovirus immediate early gene expression: a therapeutic option? *Antiviral Res* 49:129-145
28. Kaushansky K (2009) Molecular mechanisms of thrombopoietin signaling. *J Thromb Haemost* 7 Suppl 1:235-238
29. Erickson-Miller CL, Delorme E, Tian SS, Hopson CB, Landis AJ, Valoret EI, Sellers TS, Rosen J, Miller SG, Luengo JI, Duffy KJ, Jenkins JM (2009) Preclinical activity of eltrombopag (SB-497115), an oral, nonpeptide thrombopoietin receptor agonist. *Stem Cells* 27:424-430
30. Roth M, Will B, Simkin G, Narayanagari S, Barreyro L, Bartholdy B, Tamari R, Mitsiades CS, Verma A, Steidl U (2012) Eltrombopag inhibits the proliferation of leukemia cells via reduction of intracellular iron and induction of differentiation. *Blood* 120:386-394
31. Vlachodimitropoulou E, Chen YL, Garbowski M, Koonyosying P, Psaila B, Sola-Visner M, Cooper N, Hider R, Porter J (2017) Eltrombopag: a powerful chelator of

- cellular or extracellular iron(III) alone or combined with a second chelator. Blood  
130:1923-1933
32. Cinatl J Jr, Cinatl J, Rabenau H, Gmbel HO, Kornhuber B, Doerr HW (1994) In  
vitro inhibition of human cytomegalovirus replication by desferrioxamine. Antiviral Res  
25:73-77
33. Cinatl J Jr, Hoffmann F, Cinatl J, Weber B, Scholz M, Rabenau H, Stieneker F,  
Kabickova H, Blasko M, Doerr HW (1996) In vitro inhibition of human cytomegalovirus  
replication by calcium trisodium diethylenetriaminepentaacetic acid. Antiviral Res  
31:23-34
34. Kloover JS, Scholz M, Cinatl J Jr, Lautenschlager I, Grauls GE, Bruggeman CA  
(1999) Effect of desferrioxamine (DFO) and calcium trisodium  
diethylenetriaminepentaacetic acid (DTPA) on rat cytomegalovirus replication in vitro  
and in vivo. Antiviral Res 44:55-65
35. Martelius T, Scholz M, Krogerus L, Hckerstedt K, Loginov R, Bruggeman C, Cinatl  
J Jr, Doerr HW, Lautenschlager I (1999) Antiviral and immunomodulatory effects of  
desferrioxamine in cytomegalovirus-infected rat liver allografts with rejection.  
Transplantation 68:1753-1761
36. Vogel JU, Michaelis M, Neyts J, Blaheta RA, Snoeck R, Andrei G, De Clercq E,  
Rabenau HF, Kreuter J, Cinatl J Jr, Doerr HW (2002) Antiviral and immunomodulatory  
activity of the metal chelator ethylenediaminedisuccinic acid against cytomegalovirus  
in vitro and in vivo. Antiviral Res 55:179-188
37. Crowe WE, Maglova LM, Ponka P, Russell JM (2004) Human cytomegalovirus-  
induced host cell enlargement is iron dependent. Am J Physiol Cell Physiol  
287:C1023-1030

38. Michaelis M, Langer K, Arnold S, Doerr HW, Kreuter J, Cinatl J Jr (2004) Pharmacological activity of DTPA linked to protein-based drug carrier systems. *Biochem Biophys Res Commun* 323:1236-1240
39. Zvezdaryk KJ, Ferris MB, Strong AL, Morris CA, Bunnell BA, Dhurandhar NV, Gimble JM, Sullivan DE (2015) Human cytomegalovirus infection of human adipose-derived stromal/stem cells restricts differentiation along the adipogenic lineage. *Adipocyte* 5:53-64.
40. Craig JM, Macaulay JC, Weller TH, Wirth P (1957) Isolation of intranuclear inclusion producing agents from infants with illnesses resembling cytomegalic inclusion disease. *Proc Soc Exp Biol Med* 94:4-12
41. Plotkin SA, Furukawa T, Zygraich N, Huygelen C (1975) Candidate cytomegalovirus strain for human vaccination. *Infect Immun* 12:521-527
42. Cihlar T, Fuller MD, Cherrington JM (1998) Characterization of drug resistance-associated mutations in the human cytomegalovirus DNA polymerase gene by using recombinant mutant viruses generated from overlapping DNA fragments. *J Virol* 72:5927-5936
43. Chou S, Marousek G, Bowlin TL (2012) Cyclopropavir susceptibility of cytomegalovirus DNA polymerase mutants selected after antiviral drug exposure. *Antimicrob Agents Chemother* 56:197-201
44. Baldanti F, Underwood MR, Talarico CL, Simoncini L, Sarasini A, Biron KK, Gerna G (1998) The Cys607-->Tyr change in the UL97 phosphotransferase confers ganciclovir resistance to two human cytomegalovirus strains recovered from two immunocompromised patients. *Antimicrob Agents Chemother* 42:444-446

45. Chou S, Ercolani RJ, Sahoo MK, Lefterova MI, Strasfeld LM, Pinsky BA (2014) Improved detection of emerging drug-resistant mutant cytomegalovirus subpopulations by deep sequencing. *Antimicrob Agents Chemother* 58:4697-4702
46. Lurain NS, Chou S (2010) Antiviral drug resistance of human cytomegalovirus. *Clin Microbiol Rev* 23:689-712
47. Chou S, Ercolani RJ, Vanarsdall AL (2017) Differentiated Levels of Ganciclovir Resistance Conferred by Mutations at Codons 591 to 603 of the Cytomegalovirus UL97 Kinase Gene. *J Clin Microbiol* 55:2098-2104
48. Chemaly RF, Hill JA, Voigt S, Peggs KS (2019) In vitro comparison of currently available and investigational antiviral agents against pathogenic human double-stranded DNA viruses: A systematic literature review. *Antiviral Res* 163:50-58
49. Yuan S, Chan JF, Ye ZW, Wen L, Tsang TG, Cao J, Huang J, Chan CC, Chik KK, Choi GK, Cai JP, Yin F, Chu H, Liang M, Jin DY, Yuen KY (2019) Screening of an FDA-Approved Drug Library with a Two-Tier System Identifies an Entry Inhibitor of Severe Fever with Thrombocytopenia Syndrome Virus. *Viruses* 2019; 11: pii: E385.
50. Sun Y, Bao Q, Xuan B, Xu W, Pan D, Li Q, Qian Z (2018) Human Cytomegalovirus Protein pUL38 Prevents Premature Cell Death by Binding to Ubiquitin-Specific Protease 24 and Regulating Iron Metabolism. *J Virol* 92:pii:e00191-18

## Figure legends

**Figure 1.** Effects of eltrombopag on HCMV late antigen (LA) expression in primary human foreskin fibroblasts (HFFs). A) Representative dose response curves showing the effects of eltrombopag on HCMV LA expression and HFF viability (as determined after 120h of incubation). Eltrombopag concentrations that reduce HCMV LA expression by 50% ( $IC_{50}$ ) and the viability of proliferating HFFs by 50% ( $CC_{50}$ ) relative to untreated controls are also provided. Eltrombopag was continuously present from the time of virus infection. B) Representative photographs and Western blots demonstrating the effects of eltrombopag on HCMV LA expression. In A) and B), HFFs were infected with HCMV strain Hi91 (MOI 0.02). HCMV late antigen (LA) expression was detected 120h post infection. C) Representative dose-response curves and  $IC_{50}$  values indicating effects of eltrombopag on HCMV LA expression in HFFs infected with different MOIs of HCMV strain Hi91 as detected 120h post infection.

**Figure 2.** Effects of eltrombopag on HCMV replication and at different stages of the viral replication cycle. HFFs were infected with HCMV strain Hi91 (MOI 0.02). HCMV late antigen (LA) expression and virus titres were detected 120h post infection. A) Virus titres in the absence or presence of eltrombopag. B) Representative dose-response curves and  $IC_{50}$  values indicating the effects of eltrombopag on HCMV LA expression after 24h of pre-treatment, after treatment during the 1h adsorption period, after drug addition post infection following the 1h virus adsorption period, after drug addition 24h post infection, and after drug addition 48h post infection.

**Figure 3.** Eltrombopag inhibits HCMV infection by iron depletion. A) Representative dose response curve indicating the effects of eltrombopag on cytopathogenic effect (CPE) formation (detected 120h post infection) in murine cytomegalovirus (MOI 1)-infected murine NIH/3T3 fibroblasts and eltrombopag concentration that reduces CPE formation by 50% ( $IC_{50}$ ) relative to untreated control. The findings indicate that eltrombopag interferes with cytomegalovirus replication by thrombopoietin receptor-independent effects, since eltrombopag does not activate the murine thrombopoietin receptor. The investigated eltrombopag concentrations did not affect NIH/3T3 cell viability. B) Representative growth curve indicating the effects of equimolar concentrations of  $Fe(III)Cl_3$  on the anti-HCMV effects of eltrombopag as indicated by HCMV LA expression in HCMV Hi91 (MOI 0.02)-infected human foreskin fibroblasts (HFFs) 120h post infection. Equimolar  $Fe(III)Cl_3$  concentrations circumvent the anti-HCMV effects exerted by eltrombopag.

**Figure 4.** Antiviral effects of eltrombopag in combination with ganciclovir. A) Effects of equimolar drug concentrations on HCMV LA expression in HCMV Hi91 (MOI 0.02)-infected human foreskin fibroblasts (HFFs) 120h post infection. \* $P < 0.05$  compared to either single treatment; B) Combination indices (CIs) at different levels of inhibition and weighted average CI values ( $CI_{wt}$ ) calculated as  $(CI_{50} + 2 \times CI_{75} + 3 \times CI_{90} + 4 \times CI_{95}) / 10$  [24].  $CI_{wt}$  values  $\leq 0.7$  indicate synergistic effects [24].

**Figure 5.** Antiviral effects of eltrombopag determined in different cell types infected by different human cytomegalovirus (HCMV) strains and clinical isolates. Human foreskin fibroblasts (HFFs) were infected at an MOI of 0.02 and adipose-derived adult mesenchymal stem cells (ASCs) at an MOI of 5. HCMV late antigen (LA) expression

was determined 120h post infection. A) Eltrombopag concentrations that reduce HCMV LA expression by 50% (IC<sub>50</sub>). Numerical values are provided in Suppl. Table 2. The investigated eltrombopag concentrations did not affect cell viability. B) Average eltrombopag IC<sub>50</sub>s for each virus strain and isolate in HFFs and ASCs. C) Average eltrombopag IC<sub>50</sub>s across virus strains and isolates in HFFs and ASCs. D) Representative growth curve indicating the effects of equimolar concentrations of Fe(III)Cl<sub>3</sub> on the anti-HCMV effects of eltrombopag as indicated by HCMV LA expression in U1 (MOI 0.02)-infected HFFs 120h post infection.



Figure 1

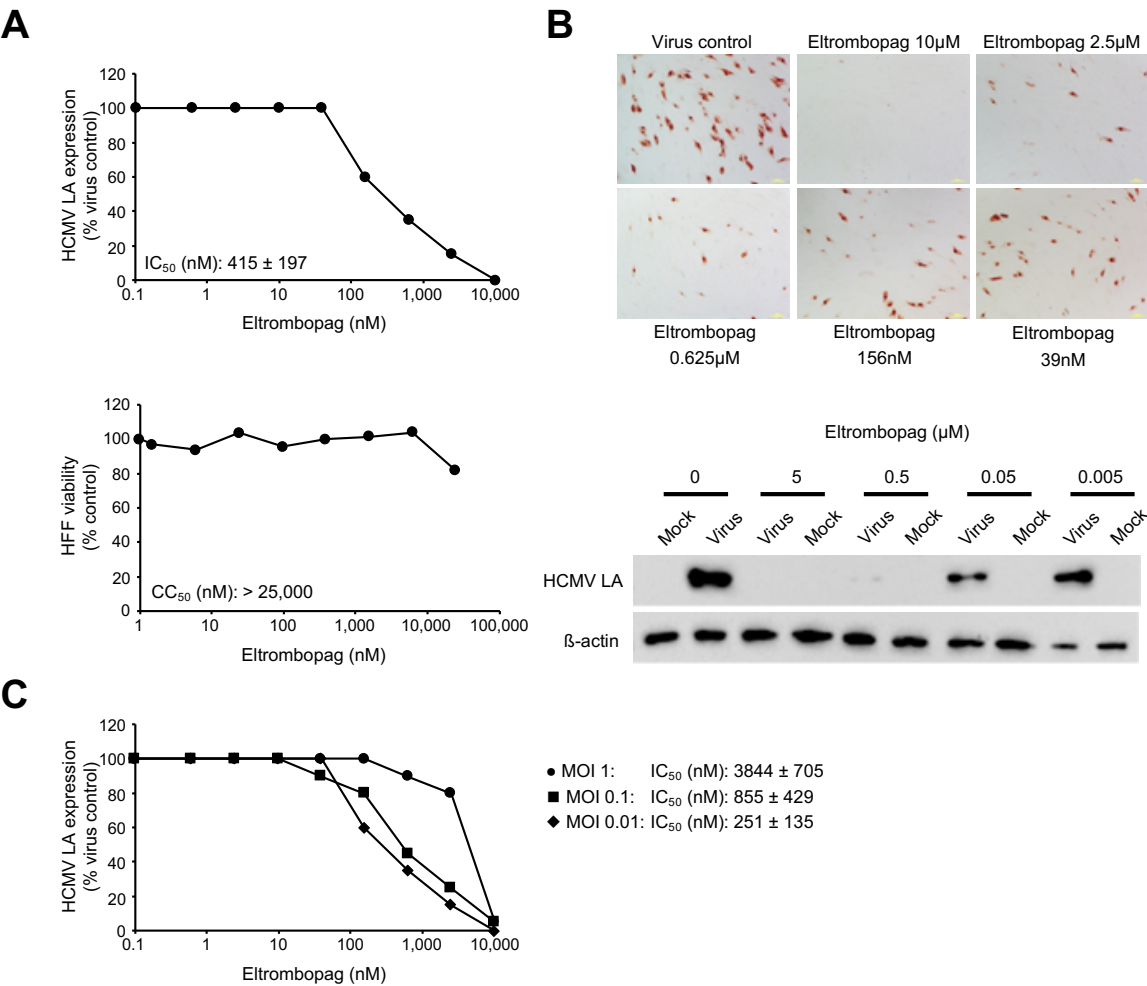

524

525

**Figure 2**

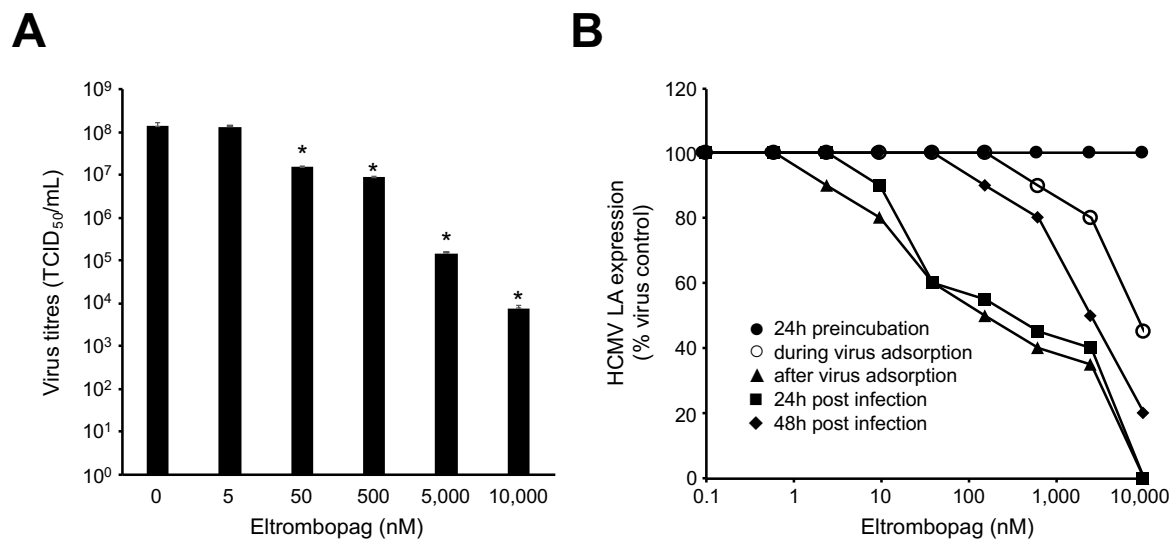

526

527

## Figure 3

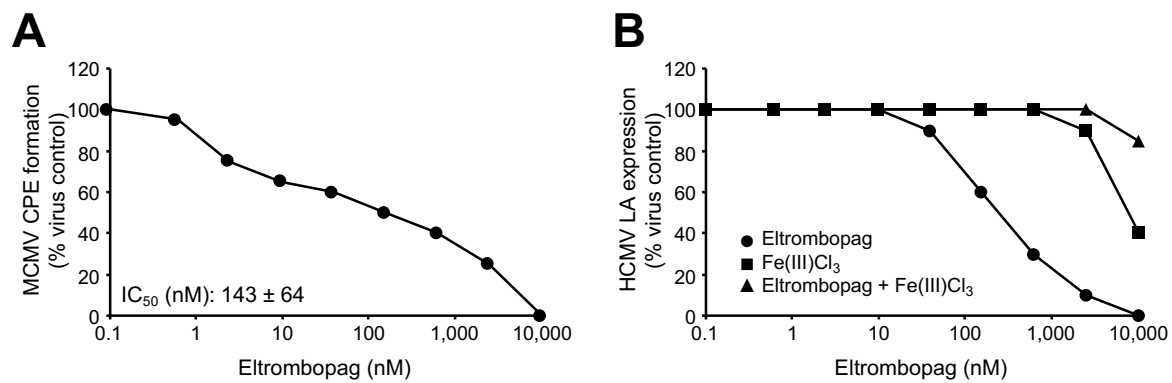

528

529

## Figure 4

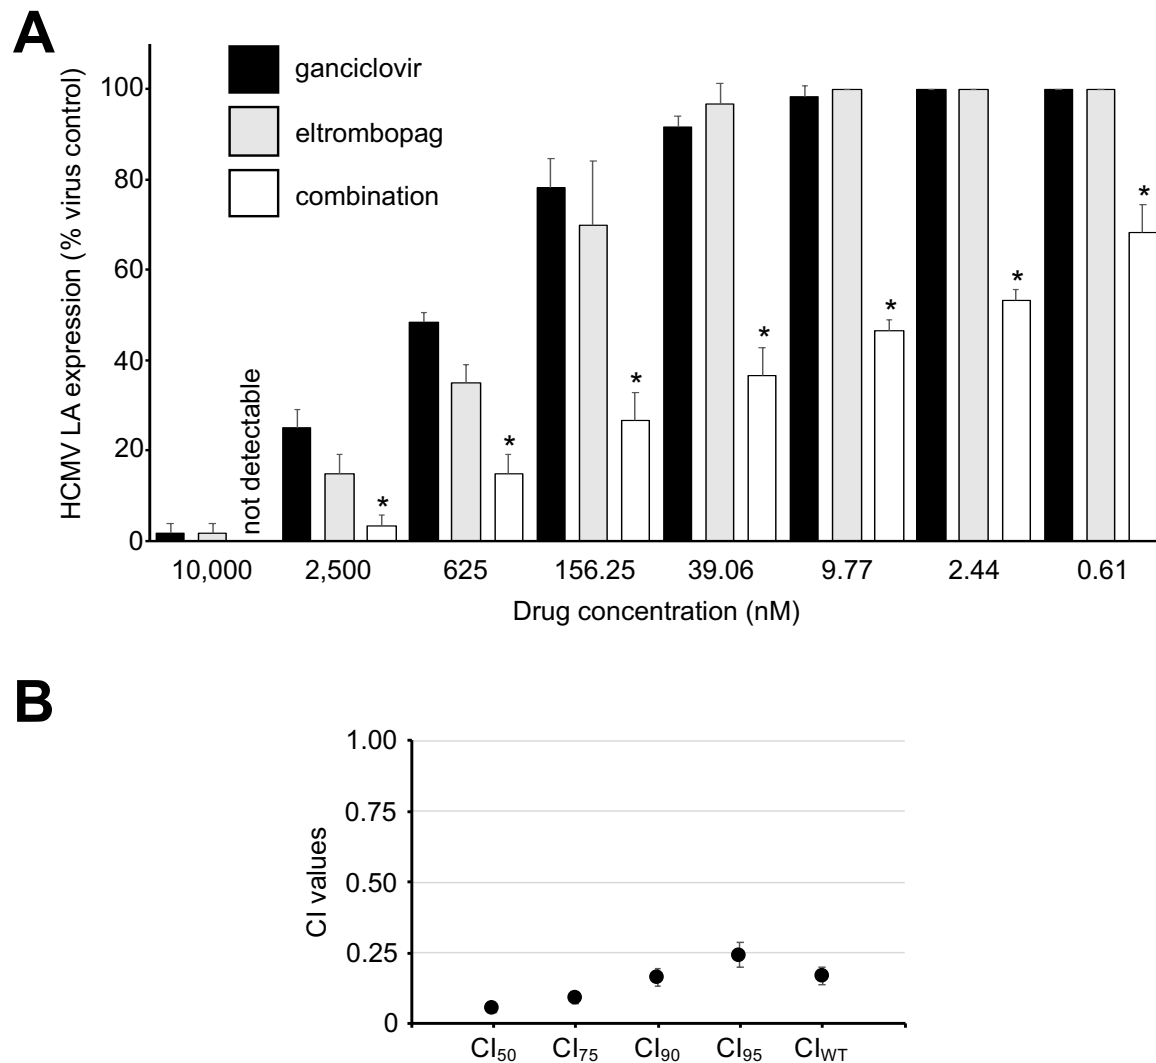

530

531

# Figure 5

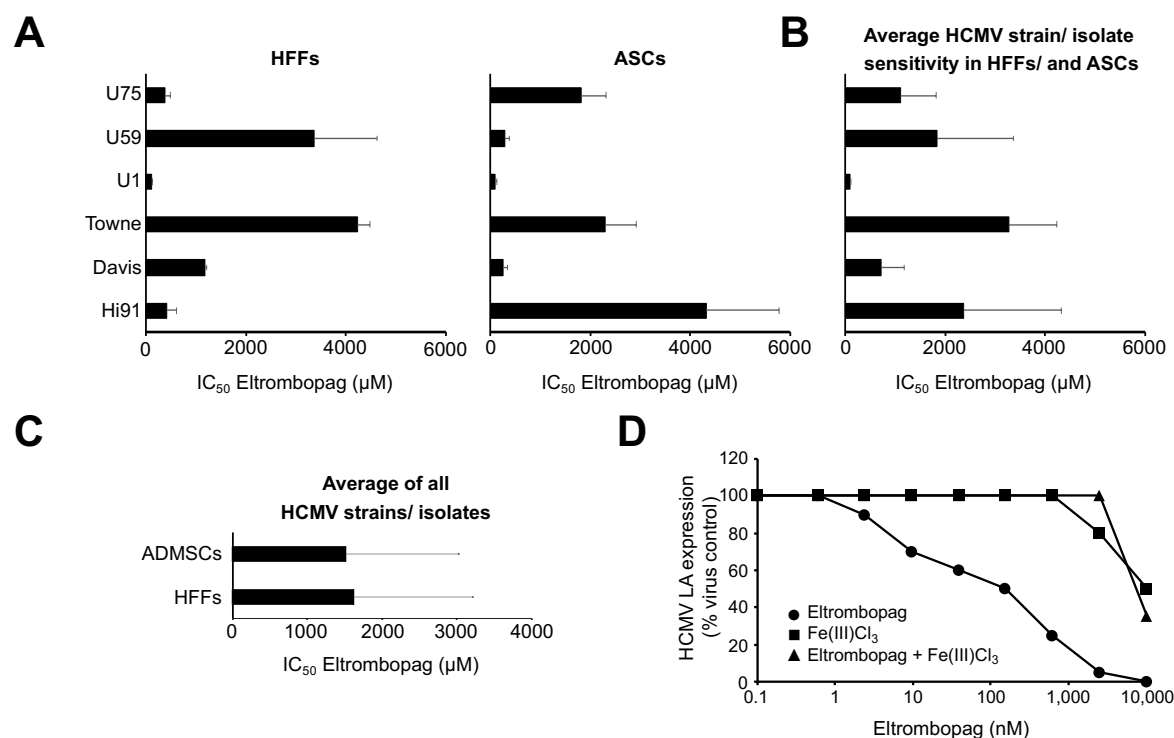

532

533
